# Supplementary material for: Cost-utility analysis of de-escalating biological disease-modifying anti-rheumatic drugs in patients with rheumatoid arthritis
Source: PLoS One. 2020 Jan 2;15(1):e0226754. doi: 10.1371/journal.pone.0226754 (PMC6939943; doi:10.1371/journal.pone.0226754)
Supplement: S1 R Code — (R) [file pone.0226754.s003.R]

install.packages("dplyr")
install.packages("diagram")
install.packages("heemod")
install.packages("ggplot2")
install.packages("xlsx")

library(dplyr)
library(diagram)
library(heemod)
library(ggplot2)
library(xlsx)

#############################################
# Im Vergleich zu den anderen Modellen wird in dieser Modellstruktur nun zugelassen, dass die Patienten nach einer Stabilität in LDA keine Verbesserung
# in REM sondern direkt in TP_REM/WD_REM erhalten. Die bidirektionale verbindung zwischen REM und LDA wurde vom Reviewer von PLOS ONE kritisiert
# Vergleich der Ergebnisse und aller Szenarios
###############################################


#Abk?rzungen:
#tp = tapering
#sc = standard care
#wd = withdrawal
#dsa = deterministic sensitivity analysis
#psa = probabilisitc sensitivity analysis


#### Importieren der gepoolten Werte ####
#### Setzen des Arbeitsverzeichnisses f?r den Import

setwd("Z:/bwl/Arbeitsbereiche/FB_Sozoek_BWL_HealthCareManagement/Mitarbeiter/03 Projekte laufend/RA Deeskalation/1_Pooling/190902 3 month probs")

#### Einlesen der gepoolten Wahrscheinlichkeiten aus xlsx files 


sc_pooled_probs <- read.xlsx("overview_standard_care.xlsx", 1)
sc_pooled_probs <- select(sc_pooled_probs,
                          NA.,
                          effect.size
)

sc_pooled_probs = setNames(data.frame(t(sc_pooled_probs[,-1])), sc_pooled_probs[,1])

tp_pooled_probs <- read.xlsx("overview_tapering.xlsx", 1)
tp_pooled_probs <- select(tp_pooled_probs,
                          NA.,
                          effect.size
)
tp_pooled_probs = setNames(data.frame(t(tp_pooled_probs[,-1])), tp_pooled_probs[,1])


wd_pooled_probs <- read.xlsx("overview_withdrawal.xlsx", 1)
wd_pooled_probs <- select(wd_pooled_probs,
                          NA.,
                          effect.size
)
wd_pooled_probs = setNames(data.frame(t(wd_pooled_probs[,-1])), wd_pooled_probs[,1])


#### Setzen des Arbeitsverzeichnisses f?r das Modell

setwd("Z:/bwl/Arbeitsbereiche/FB_Sozoek_BWL_HealthCareManagement/Mitarbeiter/03 Projekte laufend/RA Deeskalation/2_Models/3-months")


###### Definition der Modellparameter #####

param <- define_parameters(
  
  #Alter der Kohorte
  
  cohort_age = (45 + model_time / 4),
  
  #Anteil m?nnlich/weiblich
  
  male = .25,
  female = 1 - male,
  
  #Discount Rate -> half year discount rate = (1+dr)^(6/12) - 1
  dr = ((1 + 0.03)^(3/12)) - 1,
  
  #Mortalit?tsrisiko (dynamisch, in Abh?ngigkeit der vergangenen Modellzeit, geschlecht)
  
  mr = male * rescale_prob(get_who_mr(age = cohort_age, sex = "MLE", country = "DEU", local = TRUE), to = 3/12, from = 12/12) + 
    female * rescale_prob(get_who_mr(age = cohort_age, sex = "FMLE", country = "DEU", local = TRUE), to = 3/12, from = 12/12),
  
  #Zun?chst werden die Wahrscheinlichkeiten aus dem Pooling auf Hilfsvariablen ?bertragen, um sp?ter bei der DSA und PSA die
  #Variation der Werte zu erm?glichen, ohne dass die Standardisierung auf 1 ?berschrieben wird.
  
  #Zun?chst werden die Wahrscheinlichkeiten aus dem Pooling auf Hilfsvariablen ?bertragen, um sp?ter bei der DSA und PSA die
  #Variation der Werte zu erm?glichen, ohne dass die Standardisierung auf 1 ?berschrieben wird.
  
  ##### STANDARD CARE
  
  sc_p_rem_1 = sc_pooled_probs[,1],
  sc_p_rem_2 = sc_pooled_probs[,2],
  sc_p_rem_3 = sc_pooled_probs[,3],
  
  sc_p_lda_1 = sc_pooled_probs[,4],
  sc_p_lda_2 = sc_pooled_probs[,5],
  sc_p_lda_3 = sc_pooled_probs[,6],
  
  sc_p_mhda_1 = sc_pooled_probs[,7],
  sc_p_mhda_2 = sc_pooled_probs[,8],
  sc_p_mhda_3 = sc_pooled_probs[,9],
  
  tp_p_rem_1 = tp_pooled_probs[,1],
  tp_p_rem_2 = tp_pooled_probs[,2],
  tp_p_rem_3 = tp_pooled_probs[,3],
  
  tp_p_lda_1 = tp_pooled_probs[,4],
  tp_p_lda_2 = tp_pooled_probs[,5],
  tp_p_lda_3 = tp_pooled_probs[,6],
  
  wd_p_rem_1 = wd_pooled_probs[,1],
  wd_p_rem_2 = wd_pooled_probs[,2],
  wd_p_rem_3 = wd_pooled_probs[,3],
  
  wd_p_lda_1 = wd_pooled_probs[,4],
  wd_p_lda_2 = wd_pooled_probs[,5],
  wd_p_lda_3 = wd_pooled_probs[,6],
  
  
  #### Standard Care ####
  
  #REM 
  
  sc_p_rem_sum = sc_p_rem_1 + sc_p_rem_2 + sc_p_rem_3 + mr,
  
  sc_p_rem_rem = sc_p_rem_1 / sc_p_rem_sum,
  sc_p_rem_lda = sc_p_rem_2 / sc_p_rem_sum,
  sc_p_rem_mhda = sc_p_rem_3 / sc_p_rem_sum,
  sc_p_rem_death = mr / sc_p_rem_sum,
  
  #LDA
  
  sc_p_lda_sum = sc_p_lda_1 + sc_p_lda_2 + sc_p_lda_3 + mr,
  
  sc_p_lda_rem = sc_p_lda_1 / sc_p_lda_sum,
  sc_p_lda_lda = sc_p_lda_2 / sc_p_lda_sum,
  sc_p_lda_mhda = sc_p_lda_3 / sc_p_lda_sum,
  sc_p_lda_death = mr / sc_p_lda_sum,
  
  #MHDA
  
  sc_p_mhda_sum = sc_p_mhda_1 + sc_p_mhda_2 + sc_p_mhda_3 + mr*2.34,
  
  sc_p_mhda_rem = sc_p_mhda_1 / sc_p_mhda_sum,
  sc_p_mhda_lda = sc_p_mhda_2 / sc_p_mhda_sum,
  sc_p_mhda_mhda = sc_p_mhda_3 / sc_p_mhda_sum,
  sc_p_mhda_death = mr * 2.34 / sc_p_mhda_sum,
  
  
  ##### TAPERING #####
  
  #REM
  
  tp_p_rem_sum = sc_p_rem_1 + sc_p_rem_2 + sc_p_rem_3 + mr,
  
  #tp_p_rem_rem = 0
  tp_p_rem_s_rem = sc_p_rem_1 / tp_p_rem_sum,
  #tp_p_rem_tp_rem = 0
  tp_p_rem_lda = sc_p_rem_2 / tp_p_rem_sum,
  #tp_p_rem_s_lda = 0
  #tp_p_rem_tp_lda = 0
  tp_p_rem_mhda = sc_p_rem_3 / tp_p_rem_sum,
  tp_p_rem_death = mr / tp_p_rem_sum,
  
  
  #S_REM
  
  tp_p_s_rem_sum = sc_p_rem_1 + sc_p_rem_2 + sc_p_rem_3 + mr,
  
  #tp_p_s_rem_rem = 0
  #tp_p_s_rem_s_rem = 0 
  tp_p_s_rem_tp_rem = sc_p_rem_1 / tp_p_s_rem_sum,
  tp_p_s_rem_lda = sc_p_rem_2 / tp_p_s_rem_sum,
  #tp_p_s_rem_s_lda = 0
  #tp_p_s_rem_tp_lda = 0
  tp_p_s_rem_mhda = sc_p_rem_3 / tp_p_s_rem_sum,
  tp_p_s_rem_death = mr / tp_p_s_rem_sum,
  
  #TP_REM
  
  tp_p_tp_rem_sum = tp_p_rem_1 + tp_p_rem_2 + tp_p_rem_3 + mr,
  
  #tp_p_tp_rem_rem = 0
  #tp_p_tp_rem_s_rem = 0 
  tp_p_tp_rem_tp_rem = tp_p_rem_1 / tp_p_tp_rem_sum,
  tp_p_tp_rem_lda = tp_p_rem_2 / tp_p_tp_rem_sum,
  #tp_p_tp_rem_s_lda = 0
  #tp_p_tp_rem_tp_lda = 0
  tp_p_tp_rem_mhda = tp_p_rem_3 / tp_p_tp_rem_sum,
  tp_p_tp_rem_death = mr / tp_p_tp_rem_sum, 
  
  #LDA
  
  tp_p_lda_sum = sc_p_lda_1 + sc_p_lda_2 + sc_p_lda_3 + mr,
  
  tp_p_lda_rem = sc_p_lda_1 / tp_p_lda_sum,
  #tp_p_lda_s_rem = 0
  #tp_p_lda_tp_rem = 0
  #tp_p_lda_lda = 0
  tp_p_lda_s_lda = sc_p_lda_2 / tp_p_lda_sum,
  #tp_p_lda_tp_lda = 0
  tp_p_lda_mhda = sc_p_lda_3 / tp_p_lda_sum,
  tp_p_lda_death = mr / tp_p_lda_sum,
  
  #S_LDA
  
  tp_p_s_lda_sum = sc_p_lda_1 + sc_p_lda_2 + sc_p_lda_3 + mr,
  
  #tp_p_s_lda_rem = 0
  tp_p_s_lda_s_rem = sc_p_lda_1 / tp_p_s_lda_sum,
  #tp_p_s_lda_tp_rem = 0
  #tp_p_s_lda_lda = 0
  #tp_p_s_lda_s_lda = 0
  tp_p_s_lda_tp_lda = sc_p_lda_2 / tp_p_s_lda_sum,
  tp_p_s_lda_mhda = sc_p_lda_3 / tp_p_s_lda_sum,
  tp_p_s_lda_death = mr / tp_p_s_lda_sum, 
  
  #TP_LDA
  
  tp_p_tp_lda_sum = tp_p_lda_1 + tp_p_lda_2 + tp_p_lda_3 + mr,
  
  #tp_p_tp_lda_rem = 0
  #tp_p_tp_lda_s_rem = 0
  tp_p_tp_lda_tp_rem = tp_p_lda_1 / tp_p_tp_lda_sum,
  #tp_p_tp_lda_lda = 0
  #tp_p_tp_lda_s_lda = 0
  tp_p_tp_lda_tp_lda = tp_p_lda_2 / tp_p_tp_lda_sum,
  tp_p_tp_lda_mhda = tp_p_lda_3 / tp_p_tp_lda_sum,
  tp_p_tp_lda_death = mr / tp_p_tp_lda_sum,
  
  ##### WITHDRAWAL #####
  
  #REM
  
  wd_p_rem_sum = sc_p_rem_1 + sc_p_rem_2 + sc_p_rem_3 + mr,
  
  #wd_p_rem_rem = 0
  wd_p_rem_s_rem = sc_p_rem_1 / wd_p_rem_sum,
  #wd_p_rem_wd_rem = 0
  wd_p_rem_lda = sc_p_rem_2 / wd_p_rem_sum,
  #wd_p_rem_s_lda = 0
  #wd_p_rem_wd_lda = 0
  wd_p_rem_mhda = sc_p_rem_3 / wd_p_rem_sum,
  wd_p_rem_death = mr / wd_p_rem_sum,
  
  
  #S_REM
  
  wd_p_s_rem_sum = sc_p_rem_1 + sc_p_rem_2 + sc_p_rem_3 + mr,
  
  #wd_p_s_rem_rem = 0
  #wd_p_s_rem_s_rem = 0 
  wd_p_s_rem_wd_rem = sc_p_rem_1 / wd_p_s_rem_sum,
  wd_p_s_rem_lda = sc_p_rem_2 / wd_p_s_rem_sum,
  #wd_p_s_rem_s_lda = 0
  #wd_p_s_rem_wd_lda = 0
  wd_p_s_rem_mhda = sc_p_rem_3 / wd_p_s_rem_sum,
  wd_p_s_rem_death = mr / wd_p_s_rem_sum,
  
  #wd_REM
  
  wd_p_wd_rem_sum = wd_p_rem_1 + wd_p_rem_2 + wd_p_rem_3 + mr,
  
  #wd_p_wd_rem_rem = 0
  #wd_p_wd_rem_s_rem = 0 
  wd_p_wd_rem_wd_rem = wd_p_rem_1 / wd_p_wd_rem_sum,
  wd_p_wd_rem_lda = wd_p_rem_2 / wd_p_wd_rem_sum,
  #wd_p_wd_rem_s_lda = 0
  #wd_p_wd_rem_wd_lda = 0
  wd_p_wd_rem_mhda = wd_p_rem_3 / wd_p_wd_rem_sum,
  wd_p_wd_rem_death = mr / wd_p_wd_rem_sum,
  
  #LDA
  
  wd_p_lda_sum = sc_p_lda_1 + sc_p_lda_2 + sc_p_lda_3 + mr,
  
  wd_p_lda_rem = sc_p_lda_1 / wd_p_lda_sum,
  #wd_p_lda_s_rem = 0
  #wd_p_lda_wd_rem = 0
  #wd_p_lda_lda = 0
  wd_p_lda_s_lda = sc_p_lda_2 / wd_p_lda_sum,
  #wd_p_lda_wd_lda = 0
  wd_p_lda_mhda = sc_p_lda_3 / wd_p_lda_sum,
  wd_p_lda_death = mr / wd_p_lda_sum,
  
  #S_LDA
  
  wd_p_s_lda_sum = sc_p_lda_1 + sc_p_lda_2 + sc_p_lda_3 + mr,
  
  #wd_p_s_lda_rem = 0
  wd_p_s_lda_s_rem = sc_p_lda_1 / wd_p_s_lda_sum,
  #wd_p_s_lda_wd_rem = 0
  #wd_p_s_lda_lda = 0
  #wd_p_s_lda_s_lda = 0
  wd_p_s_lda_wd_lda = sc_p_lda_2 / wd_p_s_lda_sum,
  wd_p_s_lda_mhda = sc_p_lda_3 / wd_p_s_lda_sum,
  wd_p_s_lda_death = mr / wd_p_s_lda_sum,
  
  #wd_LDA
  
  wd_p_wd_lda_sum = wd_p_lda_1 + wd_p_lda_2 + wd_p_lda_3 + mr,
  
  #wd_p_wd_lda_rem = 0
  #wd_p_wd_lda_s_rem = 0
  wd_p_wd_lda_wd_rem = wd_p_lda_1 / wd_p_wd_lda_sum,
  #wd_p_wd_lda_lda = 0
  #wd_p_wd_lda_s_lda = 0
  wd_p_wd_lda_wd_lda = wd_p_lda_2 / wd_p_wd_lda_sum,
  wd_p_wd_lda_mhda = wd_p_lda_3 / wd_p_wd_lda_sum,
  wd_p_wd_lda_death = mr / wd_p_wd_lda_sum, 
  
  #Direkte Kosten, jährlich
  
  
  cost_bDMARD = 14834,
  cost_DMARD = 1086,
  cost_other_drugs = 45,
  
  
  cost_other_direct_REM = ifelse(cohort_age >= 65, 2024, 1495),
  cost_other_direct_LDA = ifelse(cohort_age >= 65, 2421, 2316),
  cost_other_direct_MHDA = ifelse(cohort_age >= 65, 3881, 3713),
  
  #ohne Nutzendekrement, jährlich
  
  u_REM = .75,
  u_LDA = .71,
  u_MHDA = .60,
  u_DEATH = 0,
  
  #utility decrement, jährlich
  
  decrement_sc = 0,
  decrement_tp = 0
)

###### Definition der Modellparameter: SCENARIO mit Nutzendekrement #####

param_u <- define_parameters(
  
  #Alter der Kohorte
  
  cohort_age = (45 + model_time / 4),
  
  #Anteil m?nnlich/weiblich
  
  male = .25,
  female = 1 - male,
  
  #Discount Rate -> half year discount rate = (1+dr)^(6/12) - 1
  dr = ((1 + 0.03)^(3/12)) - 1,
  
  #Mortalit?tsrisiko (dynamisch, in Abh?ngigkeit der vergangenen Modellzeit, geschlecht)
  
  mr = male * rescale_prob(get_who_mr(age = cohort_age, sex = "MLE", country = "DEU", local = TRUE), to = 3/12, from = 12/12) + 
    female * rescale_prob(get_who_mr(age = cohort_age, sex = "FMLE", country = "DEU", local = TRUE), to = 3/12, from = 12/12),
  
  #Zun?chst werden die Wahrscheinlichkeiten aus dem Pooling auf Hilfsvariablen ?bertragen, um sp?ter bei der DSA und PSA die
  #Variation der Werte zu erm?glichen, ohne dass die Standardisierung auf 1 ?berschrieben wird.
  
  ##### STANDARD CARE
  
  sc_p_rem_1 = sc_pooled_probs[,1],
  sc_p_rem_2 = sc_pooled_probs[,2],
  sc_p_rem_3 = sc_pooled_probs[,3],
  
  sc_p_lda_1 = sc_pooled_probs[,4],
  sc_p_lda_2 = sc_pooled_probs[,5],
  sc_p_lda_3 = sc_pooled_probs[,6],
  
  sc_p_mhda_1 = sc_pooled_probs[,7],
  sc_p_mhda_2 = sc_pooled_probs[,8],
  sc_p_mhda_3 = sc_pooled_probs[,9],
  
  tp_p_rem_1 = tp_pooled_probs[,1],
  tp_p_rem_2 = tp_pooled_probs[,2],
  tp_p_rem_3 = tp_pooled_probs[,3],
  
  tp_p_lda_1 = tp_pooled_probs[,4],
  tp_p_lda_2 = tp_pooled_probs[,5],
  tp_p_lda_3 = tp_pooled_probs[,6],
  
  wd_p_rem_1 = wd_pooled_probs[,1],
  wd_p_rem_2 = wd_pooled_probs[,2],
  wd_p_rem_3 = wd_pooled_probs[,3],
  
  wd_p_lda_1 = wd_pooled_probs[,4],
  wd_p_lda_2 = wd_pooled_probs[,5],
  wd_p_lda_3 = wd_pooled_probs[,6],
  
  #### Standard Care ####
  
  #REM 
  
  sc_p_rem_sum = sc_p_rem_1 + sc_p_rem_2 + sc_p_rem_3 + mr,
  
  sc_p_rem_rem = sc_p_rem_1 / sc_p_rem_sum,
  sc_p_rem_lda = sc_p_rem_2 / sc_p_rem_sum,
  sc_p_rem_mhda = sc_p_rem_3 / sc_p_rem_sum,
  sc_p_rem_death = mr / sc_p_rem_sum,
  
  #LDA
  
  sc_p_lda_sum = sc_p_lda_1 + sc_p_lda_2 + sc_p_lda_3 + mr,
  
  sc_p_lda_rem = sc_p_lda_1 / sc_p_lda_sum,
  sc_p_lda_lda = sc_p_lda_2 / sc_p_lda_sum,
  sc_p_lda_mhda = sc_p_lda_3 / sc_p_lda_sum,
  sc_p_lda_death = mr / sc_p_lda_sum,
  
  #MHDA
  
  sc_p_mhda_sum = sc_p_mhda_1 + sc_p_mhda_2 + sc_p_mhda_3 + mr*2.34,
  
  sc_p_mhda_rem = sc_p_mhda_1 / sc_p_mhda_sum,
  sc_p_mhda_lda = sc_p_mhda_2 / sc_p_mhda_sum,
  sc_p_mhda_mhda = sc_p_mhda_3 / sc_p_mhda_sum,
  sc_p_mhda_death = mr * 2.34 / sc_p_mhda_sum,
  
  
  ##### TAPERING #####
  
  #REM
  
  tp_p_rem_sum = sc_p_rem_1 + sc_p_rem_2 + sc_p_rem_3 + mr,
  
  #tp_p_rem_rem = 0
  tp_p_rem_s_rem = sc_p_rem_1 / tp_p_rem_sum,
  #tp_p_rem_tp_rem = 0
  tp_p_rem_lda = sc_p_rem_2 / tp_p_rem_sum,
  #tp_p_rem_s_lda = 0
  #tp_p_rem_tp_lda = 0
  tp_p_rem_mhda = sc_p_rem_3 / tp_p_rem_sum,
  tp_p_rem_death = mr / tp_p_rem_sum,
  
  
  #S_REM
  
  tp_p_s_rem_sum = sc_p_rem_1 + sc_p_rem_2 + sc_p_rem_3 + mr,
  
  #tp_p_s_rem_rem = 0
  #tp_p_s_rem_s_rem = 0 
  tp_p_s_rem_tp_rem = sc_p_rem_1 / tp_p_s_rem_sum,
  tp_p_s_rem_lda = sc_p_rem_2 / tp_p_s_rem_sum,
  #tp_p_s_rem_s_lda = 0
  #tp_p_s_rem_tp_lda = 0
  tp_p_s_rem_mhda = sc_p_rem_3 / tp_p_s_rem_sum,
  tp_p_s_rem_death = mr / tp_p_s_rem_sum,
  
  #TP_REM
  
  tp_p_tp_rem_sum = tp_p_rem_1 + tp_p_rem_2 + tp_p_rem_3 + mr,
  
  #tp_p_tp_rem_rem = 0
  #tp_p_tp_rem_s_rem = 0 
  tp_p_tp_rem_tp_rem = tp_p_rem_1 / tp_p_tp_rem_sum,
  tp_p_tp_rem_lda = tp_p_rem_2 / tp_p_tp_rem_sum,
  #tp_p_tp_rem_s_lda = 0
  #tp_p_tp_rem_tp_lda = 0
  tp_p_tp_rem_mhda = tp_p_rem_3 / tp_p_tp_rem_sum,
  tp_p_tp_rem_death = mr / tp_p_tp_rem_sum, 
  
  #LDA
  
  tp_p_lda_sum = sc_p_lda_1 + sc_p_lda_2 + sc_p_lda_3 + mr,
  
  tp_p_lda_rem = sc_p_lda_1 / tp_p_lda_sum,
  #tp_p_lda_s_rem = 0
  #tp_p_lda_tp_rem = 0
  #tp_p_lda_lda = 0
  tp_p_lda_s_lda = sc_p_lda_2 / tp_p_lda_sum,
  #tp_p_lda_tp_lda = 0
  tp_p_lda_mhda = sc_p_lda_3 / tp_p_lda_sum,
  tp_p_lda_death = mr / tp_p_lda_sum,
  
  #S_LDA
  
  tp_p_s_lda_sum = sc_p_lda_1 + sc_p_lda_2 + sc_p_lda_3 + mr,
  
  #tp_p_s_lda_rem = 0
  tp_p_s_lda_s_rem = sc_p_lda_1 / tp_p_s_lda_sum,
  #tp_p_s_lda_tp_rem = 0
  #tp_p_s_lda_lda = 0
  #tp_p_s_lda_s_lda = 0
  tp_p_s_lda_tp_lda = sc_p_lda_2 / tp_p_s_lda_sum,
  tp_p_s_lda_mhda = sc_p_lda_3 / tp_p_s_lda_sum,
  tp_p_s_lda_death = mr / tp_p_s_lda_sum, 
  
  #TP_LDA
  
  tp_p_tp_lda_sum = tp_p_lda_1 + tp_p_lda_2 + tp_p_lda_3 + mr,
  
  #tp_p_tp_lda_rem = 0
  #tp_p_tp_lda_s_rem = 0
  tp_p_tp_lda_tp_rem = tp_p_lda_1 / tp_p_tp_lda_sum,
  #tp_p_tp_lda_lda = 0
  #tp_p_tp_lda_s_lda = 0
  tp_p_tp_lda_tp_lda = tp_p_lda_2 / tp_p_tp_lda_sum,
  tp_p_tp_lda_mhda = tp_p_lda_3 / tp_p_tp_lda_sum,
  tp_p_tp_lda_death = mr / tp_p_tp_lda_sum,
  
  ##### WITHDRAWAL #####
  
  #REM
  
  wd_p_rem_sum = sc_p_rem_1 + sc_p_rem_2 + sc_p_rem_3 + mr,
  
  #wd_p_rem_rem = 0
  wd_p_rem_s_rem = sc_p_rem_1 / wd_p_rem_sum,
  #wd_p_rem_wd_rem = 0
  wd_p_rem_lda = sc_p_rem_2 / wd_p_rem_sum,
  #wd_p_rem_s_lda = 0
  #wd_p_rem_wd_lda = 0
  wd_p_rem_mhda = sc_p_rem_3 / wd_p_rem_sum,
  wd_p_rem_death = mr / wd_p_rem_sum,
  
  
  #S_REM
  
  wd_p_s_rem_sum = sc_p_rem_1 + sc_p_rem_2 + sc_p_rem_3 + mr,
  
  #wd_p_s_rem_rem = 0
  #wd_p_s_rem_s_rem = 0 
  wd_p_s_rem_wd_rem = sc_p_rem_1 / wd_p_s_rem_sum,
  wd_p_s_rem_lda = sc_p_rem_2 / wd_p_s_rem_sum,
  #wd_p_s_rem_s_lda = 0
  #wd_p_s_rem_wd_lda = 0
  wd_p_s_rem_mhda = sc_p_rem_3 / wd_p_s_rem_sum,
  wd_p_s_rem_death = mr / wd_p_s_rem_sum,
  
  #wd_REM
  
  wd_p_wd_rem_sum = wd_p_rem_1 + wd_p_rem_2 + wd_p_rem_3 + mr,
  
  #wd_p_wd_rem_rem = 0
  #wd_p_wd_rem_s_rem = 0 
  wd_p_wd_rem_wd_rem = wd_p_rem_1 / wd_p_wd_rem_sum,
  wd_p_wd_rem_lda = wd_p_rem_2 / wd_p_wd_rem_sum,
  #wd_p_wd_rem_s_lda = 0
  #wd_p_wd_rem_wd_lda = 0
  wd_p_wd_rem_mhda = wd_p_rem_3 / wd_p_wd_rem_sum,
  wd_p_wd_rem_death = mr / wd_p_wd_rem_sum,
  
  #LDA
  
  wd_p_lda_sum = sc_p_lda_1 + sc_p_lda_2 + sc_p_lda_3 + mr,
  
  wd_p_lda_rem = sc_p_lda_1 / wd_p_lda_sum,
  #wd_p_lda_s_rem = 0
  #wd_p_lda_wd_rem = 0
  #wd_p_lda_lda = 0
  wd_p_lda_s_lda = sc_p_lda_2 / wd_p_lda_sum,
  #wd_p_lda_wd_lda = 0
  wd_p_lda_mhda = sc_p_lda_3 / wd_p_lda_sum,
  wd_p_lda_death = mr / wd_p_lda_sum,
  
  #S_LDA
  
  wd_p_s_lda_sum = sc_p_lda_1 + sc_p_lda_2 + sc_p_lda_3 + mr,
  
  #wd_p_s_lda_rem = 0
  wd_p_s_lda_s_rem = sc_p_lda_1 / wd_p_s_lda_sum,
  #wd_p_s_lda_wd_rem = 0
  #wd_p_s_lda_lda = 0
  #wd_p_s_lda_s_lda = 0
  wd_p_s_lda_wd_lda = sc_p_lda_2 / wd_p_s_lda_sum,
  wd_p_s_lda_mhda = sc_p_lda_3 / wd_p_s_lda_sum,
  wd_p_s_lda_death = mr / wd_p_s_lda_sum,
  
  #wd_LDA
  
  wd_p_wd_lda_sum = wd_p_lda_1 + wd_p_lda_2 + wd_p_lda_3 + mr,
  
  #wd_p_wd_lda_rem = 0
  #wd_p_wd_lda_s_rem = 0
  wd_p_wd_lda_wd_rem = wd_p_lda_1 / wd_p_wd_lda_sum,
  #wd_p_wd_lda_lda = 0
  #wd_p_wd_lda_s_lda = 0
  wd_p_wd_lda_wd_lda = wd_p_lda_2 / wd_p_wd_lda_sum,
  wd_p_wd_lda_mhda = wd_p_lda_3 / wd_p_wd_lda_sum,
  wd_p_wd_lda_death = mr / wd_p_wd_lda_sum, 
  
  #Direkte Kosten, jährlich
  
  
  cost_bDMARD = 14834,
  cost_DMARD = 1086,
  cost_other_drugs = 45,
  
  
  cost_other_direct_REM = ifelse(cohort_age >= 65, 2024, 1495),
  cost_other_direct_LDA = ifelse(cohort_age >= 65, 2421, 2316),
  cost_other_direct_MHDA = ifelse(cohort_age >= 65, 3881, 3713),
  
  #ohne Nutzendekrement, jährlich
  
  u_REM = .75,
  u_LDA = .71,
  u_MHDA = .60,
  u_DEATH = 0,
  
  #utility decrement, jährlich
  
  decrement_sc = 0.0567, 
  decrement_tp = 0.0284
)


##### Definition der Transition Matrix #####
#States, welche bei Standard Care nicht erreicht werden k?nnen, sind mit 0 gekennzeichnet 

#Standard Care

mat_standard <- define_transition(
  sc_p_rem_rem, 0, 0, 0, 0,sc_p_rem_lda, 0, 0, 0, 0, sc_p_rem_mhda, sc_p_rem_death,
  0, 1, 0, 0, 0, 0, 0, 0, 0, 0, 0, 0,
  0, 0, 1, 0, 0, 0, 0, 0, 0, 0, 0, 0,
  0, 0, 0, 1, 0, 0, 0, 0, 0, 0, 0, 0,
  0, 0, 0, 0, 1, 0, 0, 0, 0, 0, 0, 0,
  sc_p_lda_rem, 0, 0, 0, 0, sc_p_lda_lda, 0, 0, 0, 0, sc_p_lda_mhda, sc_p_lda_death,
  0, 0, 0, 0, 0, 0, 1, 0, 0, 0, 0, 0,
  0, 0, 0, 0, 0, 0, 0, 1, 0, 0, 0, 0,
  0, 0, 0, 0, 0, 0, 0, 0, 1, 0, 0, 0,
  0, 0, 0, 0, 0, 0, 0, 0, 0, 1, 0, 0,
  sc_p_mhda_rem, 0, 0, 0, 0, sc_p_mhda_lda, 0, 0, 0, 0, sc_p_mhda_mhda, sc_p_mhda_death,
  0, 0, 0, 0, 0, 0, 0, 0, 0, 0, 0, 1,
  state_names =  c("REM", "S_REM", "TP_REM","S_TP_REM", "WD_REM", "LDA", "S_LDA", "TP_LDA", "S_TP_LDA", "WD_LDA","MHDA", "Death")
)

#Tapering

mat_tapering <- define_transition(
  0, tp_p_rem_s_rem, 0, 0, 0, tp_p_rem_lda, 0, 0, 0, 0,tp_p_rem_mhda, tp_p_rem_death,
  0, 0, tp_p_s_rem_tp_rem, 0, 0, tp_p_s_rem_lda, 0, 0, 0, 0, tp_p_s_rem_mhda, tp_p_s_rem_death,
  0, 0, tp_p_tp_rem_tp_rem, 0, 0, tp_p_tp_rem_lda, 0, 0, 0, 0, tp_p_tp_rem_mhda, tp_p_tp_rem_death,
  0, 0, 0, 1, 0, 0, 0, 0, 0, 0, 0, 0,
  0, 0, 0, 0, 1, 0, 0, 0, 0, 0, 0, 0,
  0, tp_p_lda_rem, 0, 0, 0, 0, tp_p_lda_s_lda, 0, 0, 0, tp_p_lda_mhda, tp_p_lda_death,
  0, 0, tp_p_s_lda_s_rem, 0, 0, 0, 0, tp_p_s_lda_tp_lda, 0, 0, tp_p_s_lda_mhda, tp_p_s_lda_death,
  0, 0, tp_p_tp_lda_tp_rem, 0, 0, 0, 0, tp_p_tp_lda_tp_lda, 0, 0, tp_p_tp_lda_mhda, tp_p_tp_lda_death,
  0, 0, 0, 0, 0, 0, 0, 0, 1, 0, 0, 0,
  0, 0, 0, 0, 0, 0, 0, 0, 0, 1, 0, 0,
  sc_p_mhda_rem, 0, 0, 0, 0, sc_p_mhda_lda, 0, 0, 0, 0, sc_p_mhda_mhda, sc_p_mhda_death,
  0, 0, 0, 0, 0, 0, 0, 0, 0, 0, 0, 1,
  state_names =  c("REM", "S_REM", "TP_REM","S_TP_REM", "WD_REM", "LDA", "S_LDA", "TP_LDA", "S_TP_LDA", "WD_LDA","MHDA", "Death")
)

#Withdrawal

mat_withdrawal <- define_transition(
  0, wd_p_rem_s_rem, 0, 0, 0, wd_p_rem_lda, 0, 0, 0, 0,wd_p_rem_mhda, wd_p_rem_death,
  0, 0, 0, 0, wd_p_s_rem_wd_rem, wd_p_s_rem_lda, 0, 0, 0, 0, wd_p_s_rem_mhda, wd_p_s_rem_death,
  0, 0, 1, 0, 0, 0, 0, 0, 0, 0, 0, 0,
  0, 0, 0, 1, 0, 0, 0, 0, 0, 0, 0, 0,
  0, 0, 0, 0, wd_p_wd_rem_wd_rem, wd_p_wd_rem_lda, 0, 0, 0, 0, wd_p_wd_rem_mhda, wd_p_wd_rem_death,
  0, wd_p_lda_rem, 0, 0, 0, 0, wd_p_lda_s_lda, 0, 0, 0, wd_p_lda_mhda, wd_p_lda_death,
  0, 0, 0, 0, wd_p_s_lda_s_rem, 0, 0, 0, 0, wd_p_s_lda_wd_lda, wd_p_s_lda_mhda, wd_p_s_lda_death,
  0, 0, 0, 0, 0, 0, 0, 1, 0, 0, 0, 0,
  0, 0, 0, 0, 0, 0, 0, 0, 1, 0, 0, 0,
  0, 0, 0, 0, wd_p_wd_lda_wd_rem, 0, 0, 0, 0, wd_p_wd_lda_wd_lda, wd_p_wd_lda_mhda, wd_p_wd_lda_death,
  sc_p_mhda_rem, 0, 0, 0, 0, sc_p_mhda_lda, 0, 0, 0, 0, sc_p_mhda_mhda, sc_p_mhda_death,
  0, 0, 0, 0, 0, 0, 0, 0, 0, 0, 0, 1,
  state_names =  c("REM", "S_REM", "TP_REM","S_TP_REM", "WD_REM", "LDA", "S_LDA", "TP_LDA", "S_TP_LDA", "WD_LDA","MHDA", "Death")
)


#De-Escalation

mat_deescalation <- define_transition(
  0, tp_p_rem_s_rem, 0, 0, 0, tp_p_rem_lda, 0, 0, 0, 0, tp_p_rem_mhda, tp_p_rem_death,
  0, 0, tp_p_s_rem_tp_rem, 0, 0, tp_p_s_rem_lda, 0, 0, 0, 0, tp_p_s_rem_mhda, tp_p_s_rem_death,
  0, 0, 0, tp_p_tp_rem_tp_rem, 0, tp_p_tp_rem_lda, 0, 0, 0, 0, tp_p_tp_rem_mhda, tp_p_tp_rem_death,
  0, 0, 0, 0, tp_p_tp_rem_tp_rem, tp_p_tp_rem_lda, 0, 0, 0, 0, tp_p_tp_rem_mhda, tp_p_tp_rem_death,
  0, 0, 0, 0, wd_p_wd_rem_wd_rem, wd_p_wd_rem_lda, 0, 0, 0, 0, wd_p_wd_rem_mhda, wd_p_wd_rem_death,
  0, tp_p_lda_rem, 0, 0, 0, 0, tp_p_lda_s_lda, 0, 0, 0, tp_p_lda_mhda, tp_p_lda_death,
  0, 0, tp_p_s_lda_s_rem, 0, 0, 0, 0, tp_p_s_lda_tp_lda, 0, 0, tp_p_s_lda_mhda, tp_p_s_lda_death,
  0, 0, 0, tp_p_tp_lda_tp_rem, 0, 0, 0, 0, tp_p_tp_lda_tp_lda, 0, tp_p_tp_lda_mhda, tp_p_tp_lda_death,
  0, 0, 0, 0, tp_p_tp_lda_tp_rem, 0, 0, 0, 0, tp_p_tp_lda_tp_lda, tp_p_tp_lda_mhda, tp_p_tp_lda_death,
  0, 0, 0, 0, wd_p_wd_lda_wd_rem, 0, 0, 0, 0, wd_p_wd_lda_wd_lda, wd_p_wd_lda_mhda, wd_p_wd_lda_death,
  sc_p_mhda_rem, 0, 0, 0, 0, sc_p_mhda_lda, 0, 0, 0, 0, sc_p_mhda_mhda, sc_p_mhda_death,
  0, 0, 0, 0, 0, 0, 0, 0, 0, 0, 0, 1,
  state_names =  c("REM", "S_REM", "TP_REM","S_TP_REM", "WD_REM", "LDA", "S_LDA", "TP_LDA", "S_TP_LDA", "WD_LDA","MHDA", "Death")
)


#### Definition der States mit Dekrement, bei Verwendung von param wird Dekrement = 0 gesetzt, bei Verwendung von param_u sind Dekremente enthalten #####

#### Standard Care ###

#State REM

state_REM <- define_state(
  cost_total = discount(cost_bDMARD + cost_DMARD + cost_other_drugs + cost_other_direct_REM, dr),
  utility = discount(u_REM - decrement_sc, dr)
)

#State SUSTAINED REM

state_s_REM <- define_state(
  cost_total = discount(cost_bDMARD + cost_DMARD + cost_other_drugs + cost_other_direct_REM, dr),
  utility = discount(u_REM - decrement_sc, dr)
)


#State LDA

state_LDA <- define_state(
  cost_total = discount(cost_bDMARD + cost_DMARD + cost_other_drugs + cost_other_direct_LDA, dr),
  utility = discount(u_LDA - decrement_sc, dr)
)

#State SUSTAINED LDA

state_s_LDA <- define_state(
  cost_total = discount(cost_bDMARD + cost_DMARD + cost_other_drugs + cost_other_direct_LDA, dr),
  utility = discount(u_LDA - decrement_sc, dr)
)


#State MHDA

state_MHDA <- define_state(
  cost_total = discount(cost_bDMARD + cost_DMARD + cost_other_drugs + cost_other_direct_MHDA, dr),
  utility = discount(u_MHDA - decrement_sc, dr)
)


#State Death

state_death <- define_state(
  cost_total = 0,
  utility = u_DEATH
)


#State Tapering REM

state_tp_REM <- define_state(
  cost_total = discount((cost_bDMARD/2) + cost_DMARD + cost_other_drugs + cost_other_direct_REM, dr),
  utility = discount(u_REM - decrement_tp, dr)
)

#State SUSTAINED Tapering REM

state_s_tp_REM <- define_state(
  cost_total = discount((cost_bDMARD/2) + cost_DMARD + cost_other_drugs + cost_other_direct_REM, dr),
  utility = discount(u_REM - decrement_tp, dr)
)


#State Tapering LDA

state_tp_LDA <- define_state(
  cost_total = discount((cost_bDMARD/2) + cost_DMARD + cost_other_drugs + cost_other_direct_LDA, dr),
  utility = discount(u_LDA - decrement_tp, dr)
)

#State SUSTAINED Tapering LDA

state_s_tp_LDA <- define_state(
  cost_total = discount((cost_bDMARD/2) + cost_DMARD + cost_other_drugs + cost_other_direct_LDA, dr),
  utility = discount(u_LDA - decrement_tp, dr)
)

#State Withdrawal REM

state_wd_REM <- define_state(
  cost_total = discount(cost_DMARD + cost_other_drugs + cost_other_direct_REM, dr),
  utility = discount(u_REM , dr)
)

#State Withdrawal LDA

state_wd_LDA <- define_state(
  cost_total = discount(cost_DMARD + cost_other_drugs + cost_other_direct_LDA, dr),
  utility = discount(u_LDA , dr)
)

#State Death

state_wd_death <- define_state(
  cost_total = 0,
  utility = u_DEATH
)


####Definition der Strategien####

strat_standard <- define_strategy(
  transition = mat_standard,
  REM = state_REM,
  S_REM = state_s_REM,
  TP_REM = state_tp_REM,
  S_TP_REM = state_s_tp_REM,
  WD_REM = state_wd_REM,
  LDA = state_LDA,
  S_LDA = state_s_LDA,
  TP_LDA = state_tp_LDA,
  S_TP_LDA = state_s_tp_LDA,
  WD_LDA = state_wd_LDA,
  MHDA = state_MHDA,
  Death = state_death
)

strat_tapering <- define_strategy(
  transition = mat_tapering,
  REM = state_REM,
  S_REM = state_s_REM,
  TP_REM = state_tp_REM,
  S_TP_REM = state_s_tp_REM,
  WD_REM = state_wd_REM,
  LDA = state_LDA,
  S_LDA = state_s_LDA,
  TP_LDA = state_tp_LDA,
  S_TP_LDA = state_s_tp_LDA,
  WD_LDA = state_wd_LDA,
  MHDA = state_MHDA,
  Death = state_death
)

strat_withdrawal <- define_strategy(
  transition = mat_withdrawal,
  REM = state_REM,
  S_REM = state_s_REM,
  TP_REM = state_tp_REM,
  S_TP_REM = state_s_tp_REM,
  WD_REM = state_wd_REM,
  LDA = state_LDA,
  S_LDA = state_s_LDA,
  TP_LDA = state_tp_LDA,
  S_TP_LDA = state_s_tp_LDA,
  WD_LDA = state_wd_LDA,
  MHDA = state_MHDA,
  Death = state_death
)

strat_deescalation <- define_strategy(
  transition = mat_deescalation,
  REM = state_REM,
  S_REM = state_s_REM,
  TP_REM = state_tp_REM,
  S_TP_REM = state_s_tp_REM,
  WD_REM = state_wd_REM,
  LDA = state_LDA,
  S_LDA = state_s_LDA,
  TP_LDA = state_tp_LDA,
  S_TP_LDA = state_s_tp_LDA,
  WD_LDA = state_wd_LDA,
  MHDA = state_MHDA,
  Death = state_death
)


#### Run Model ####

res_mod_tapering <- run_model(
  standard = strat_standard,
  tapering = strat_tapering,
  parameters = param,
  cycles = 120, # 120 * 3 Monate = 360 Monate = 30 Jahre 
  cost = cost_total/4,
  effect = utility/4,
  init = c(0, 0, 0, 0, 0, 0, 0, 0, 0, 0, 1000, 0)
)

results_tp_base_case <- summary(res_mod_tapering)


res_mod_withdrawal <- run_model(
  standard = strat_standard,
  withdrawal = strat_withdrawal,
  parameters = param,
  cycles = 120,
  cost = cost_total /4,
  effect = utility / 4,
  init = c(0, 0, 0, 0, 0, 0, 0, 0, 0, 0, 1000, 0)
)

results_wd_base_case <- summary(res_mod_withdrawal)

res_mod_withdrawal


res_mod_deescalation <- run_model(
  standard = strat_standard,
  deescalation = strat_deescalation,
  parameters = param,
  cycles = 120,
  cost = cost_total / 4,
  effect = utility / 4,
  init = c(0, 0, 0, 0, 0, 0, 0, 0, 0, 0, 1000, 0)
)

results_de_base_case <- summary(res_mod_deescalation)

res_mod_deescalation

#### Szenario-Analyse Dekrement ####

res_mod_tapering_decrement <- run_model(
  standard = strat_standard,
  tapering = strat_tapering,
  parameters = param_u,
  cycles = 120,
  cost = cost_total / 4,
  effect = utility / 4,
  init = c(0, 0, 0, 0, 0, 0, 0, 0, 0, 0, 1000, 0)
)

results_tp_base_case_decrement <- summary(res_mod_tapering_decrement)

res_mod_withdrawal_decrement <- run_model(
  standard = strat_standard,
  tapering = strat_withdrawal,
  parameters = param_u,
  cycles = 120,
  cost = cost_total / 4,
  effect = utility / 4,
  init = c(0, 0, 0, 0, 0, 0, 0, 0, 0, 0, 1000, 0)
)

results_wd_base_case_decrement <- summary(res_mod_withdrawal_decrement)


res_mod_deescalation_decrement <- run_model(
  standard = strat_standard,
  deescalation = strat_deescalation,
  parameters = param_u,
  cycles = 120,
  cost = cost_total / 4,
  effect = utility / 4,
  init = c(0, 0, 0, 0, 0, 0, 0, 0, 0, 0, 1000, 0)
)

results_de_base_case_decrement <- summary(res_mod_deescalation_decrement)

# ##### Ergebnisse für Base-Case und Dekrement nach 3 Monaten #####
# 
# results_all_3_months <- as.data.frame(t(matrix(c(results_tp_base_case$res_comp$.cost[2], results_tp_base_case$res_comp$.effect[2], results_tp_base_case$res_comp$.icer[2],
#                                                results_wd_base_case$res_comp$.cost[2], results_wd_base_case$res_comp$.effect[2], results_wd_base_case$res_comp$.icer[2],
#                                                results_de_base_case$res_comp$.cost[2], results_de_base_case$res_comp$.effect[2], results_de_base_case$res_comp$.icer[2],
#                                                results_tp_base_case_decrement$res_comp$.cost[2], results_tp_base_case_decrement$res_comp$.effect[2], results_tp_base_case_decrement$res_comp$.icer[2],
#                                                results_wd_base_case_decrement$res_comp$.cost[2], results_wd_base_case_decrement$res_comp$.effect[2], results_wd_base_case_decrement$res_comp$.icer[2],
#                                                results_de_base_case_decrement$res_comp$.cost[2], results_de_base_case_decrement$res_comp$.effect[2], results_de_base_case_decrement$res_comp$.icer[2]
# ),
# nrow = 6,
# ncol = 3,
# byrow = TRUE)))
# 
# colnames(results_all_3_months) <- c("TP_BC", "WD_BC", "DE_BC", 
#                                     "TP_DECR", "WD_DECR", "DE_DECR"
# )
# 
# rownames(results_all_3_months) <- c("incr. cost", "incr. effect", "ICER")
# 
# 
# write.xlsx(as.data.frame(results_all_3_months), file = "results_all_3_months.xlsx")
# 
# 
# counts_tapering_3months <- get_counts(res_mod_tapering)
# counts_tapering_decr_3months <- get_counts(res_mod_tapering_decrement)
# 
# counts_withdrawal_3months <- get_counts(res_mod_withdrawal)
# counts_withdrawal_decr_3months <- get_counts(res_mod_withdrawal_decrement)
# 
# counts_deescalation_3months <- get_counts(res_mod_deescalation)
# counts_deescalation_decr_3months <- get_counts(res_mod_deescalation_decrement)
# 
# write.xlsx(as.data.frame(counts_tapering_3months), file = "counts_tapering_3months.xlsx")
# write.xlsx(as.data.frame(counts_tapering_decr_3months), file = "counts_tapering_3months.xlsx")
# 
# write.xlsx(as.data.frame(counts_withdrawal_3months), file = "counts_withdrawal_3months.xlsx")
# write.xlsx(as.data.frame(counts_withdrawal_decr_3months), file = "counts_withdrawal_3months.xlsx")
# 
# write.xlsx(as.data.frame(counts_deescalation_3months), file = "counts_deescalation_3months.xlsx")
# write.xlsx(as.data.frame(counts_deescalation_decr_3months), file = "counts_deescalation_3months.xlsx")


#### Szenario-Analyse Compliance ####

#non-compliance after 2 years

#Standard Care with compliance

mat_standard_compliance_2 <- define_transition(
  (sc_p_rem_rem*7/8), 0, 0, 0, (sc_p_rem_rem*1/8),sc_p_rem_lda, 0, 0, 0, 0, sc_p_rem_mhda, sc_p_rem_death,
  0, 1, 0, 0, 0, 0, 0, 0, 0, 0, 0, 0,
  0, 0, 1, 0, 0, 0, 0, 0, 0, 0, 0, 0,
  0, 0, 0, 1, 0, 0, 0, 0, 0, 0, 0, 0,
  0, 0, 0, 0, wd_p_wd_rem_wd_rem, wd_p_wd_rem_lda, 0, 0, 0, 0, wd_p_wd_rem_mhda, wd_p_wd_rem_death,
  sc_p_lda_rem, 0, 0, 0, 0, sc_p_lda_lda, 0, 0, 0, 0, sc_p_lda_mhda, sc_p_lda_death,
  0, 0, 0, 0, 0, 0, 1, 0, 0, 0, 0, 0,
  0, 0, 0, 0, 0, 0, 0, 1, 0, 0, 0, 0,
  0, 0, 0, 0, 0, 0, 0, 0, 1, 0, 0, 0,
  0, 0, 0, 0, 0, 0, 0, 0, 0, 1, 0, 0,
  sc_p_mhda_rem, 0, 0, 0, 0, sc_p_mhda_lda, 0, 0, 0, 0, sc_p_mhda_mhda, sc_p_mhda_death,
  0, 0, 0, 0, 0, 0, 0, 0, 0, 0, 0, 1,
  state_names =  c("REM", "S_REM", "TP_REM","S_TP_REM", "WD_REM", "LDA", "S_LDA", "TP_LDA", "S_TP_LDA", "WD_LDA","MHDA", "Death")
)


#Tapering with compliance

mat_tapering_compliance_2 <- define_transition(
  0, tp_p_rem_s_rem, 0, 0, 0, tp_p_rem_lda, 0, 0, 0, 0,tp_p_rem_mhda, tp_p_rem_death,
  0, 0, (tp_p_s_rem_tp_rem*7/8), 0, (tp_p_s_rem_tp_rem*1/8), tp_p_s_rem_lda, 0, 0, 0, 0, tp_p_s_rem_mhda, tp_p_s_rem_death,
  0, 0, (tp_p_tp_rem_tp_rem*7/8), 0, (tp_p_tp_rem_tp_rem*1/8), tp_p_tp_rem_lda, 0, 0, 0, 0, tp_p_tp_rem_mhda, tp_p_tp_rem_death,
  0, 0, 0, 1, 0, 0, 0, 0, 0, 0, 0, 0,
  0, 0, 0, 0, wd_p_wd_rem_wd_rem, wd_p_wd_rem_lda, 0, 0, 0, 0, wd_p_wd_rem_mhda, wd_p_wd_rem_death,
  0, tp_p_lda_rem, 0, 0, 0, 0, tp_p_lda_s_lda, 0, 0, 0, tp_p_lda_mhda, tp_p_lda_death,
  0, 0, tp_p_s_lda_s_rem, 0, 0, 0, 0, tp_p_s_lda_tp_lda, 0, 0, tp_p_s_lda_mhda, tp_p_s_lda_death,
  0, 0, tp_p_tp_lda_tp_rem, 0, 0, 0, 0, tp_p_tp_lda_tp_lda, 0, 0, tp_p_tp_lda_mhda, tp_p_tp_lda_death,
  0, 0, 0, 0, 0, 0, 0, 0, 1, 0, 0, 0,
  0, 0, 0, 0, 0, 0, 0, 0, 0, 1, 0, 0,
  sc_p_mhda_rem, 0, 0, 0, 0, sc_p_mhda_lda, 0, 0, 0, 0, sc_p_mhda_mhda, sc_p_mhda_death,
  0, 0, 0, 0, 0, 0, 0, 0, 0, 0, 0, 1,
  state_names =  c("REM", "S_REM", "TP_REM","S_TP_REM", "WD_REM", "LDA", "S_LDA", "TP_LDA", "S_TP_LDA", "WD_LDA","MHDA", "Death")
)

#Compliance for withdrawal and deescalation macht keinen Sinn, da hier eh nach kurzer Zeit Entzug stattfindet

strat_standard_compliance_2 <- define_strategy(
  transition = mat_standard_compliance_2,
  REM = state_REM,
  S_REM = state_s_REM,
  TP_REM = state_tp_REM,
  S_TP_REM = state_s_tp_REM,
  WD_REM = state_wd_REM,
  LDA = state_LDA,
  S_LDA = state_s_LDA,
  TP_LDA = state_tp_LDA,
  S_TP_LDA = state_s_tp_LDA,
  WD_LDA = state_wd_LDA,
  MHDA = state_MHDA,
  Death = state_death
)


strat_tapering_compliance_2 <- define_strategy(
  transition = mat_tapering_compliance_2,
  REM = state_REM,
  S_REM = state_s_REM,
  TP_REM = state_tp_REM,
  S_TP_REM = state_s_tp_REM,
  WD_REM = state_wd_REM,
  LDA = state_LDA,
  S_LDA = state_s_LDA,
  TP_LDA = state_tp_LDA,
  S_TP_LDA = state_s_tp_LDA,
  WD_LDA = state_wd_LDA,
  MHDA = state_MHDA,
  Death = state_death
)


#### Run Model

res_mod_compliance_tp_2 <- run_model(
  standard_compliance = strat_standard_compliance_2,
  tapering_compliance = strat_tapering_compliance_2,
  parameters = param,
  cycles = 120,
  cost = cost_total / 4,
  effect = utility / 4,
  init = c(0, 0, 0, 0, 0, 0, 0, 0, 0, 0, 1000, 0)
)

results_tp_compliance_2 <- summary(res_mod_compliance_tp_2)

res_mod_compliance_wd_2 <- run_model(
  standard_compliance = strat_standard_compliance_2,
  withdrawal = strat_withdrawal,
  parameters = param,
  cycles = 120,
  cost = cost_total / 4,
  effect = utility / 4,
  init = c(0, 0, 0, 0, 0, 0, 0, 0, 0, 0, 1000, 0)
)

results_wd_compliance_2 <- summary(res_mod_compliance_wd_2)


res_mod_compliance_de_2 <- run_model(
  standard_compliance = strat_standard_compliance_2,
  deescalation = strat_deescalation,
  parameters = param,
  cycles = 120,
  cost = cost_total / 4,
  effect = utility / 4,
  init = c(0, 0, 0, 0, 0, 0, 0, 0, 0, 0, 1000, 0)
)

results_de_compliance_2 <- summary(res_mod_compliance_de_2)


#non-compliance after 3 years

mat_standard_compliance_3 <- define_transition(
  (sc_p_rem_rem*11/12), 0, 0, 0, (sc_p_rem_rem*1/12),sc_p_rem_lda, 0, 0, 0, 0, sc_p_rem_mhda, sc_p_rem_death,
  0, 1, 0, 0, 0, 0, 0, 0, 0, 0, 0, 0,
  0, 0, 1, 0, 0, 0, 0, 0, 0, 0, 0, 0,
  0, 0, 0, 1, 0, 0, 0, 0, 0, 0, 0, 0,
  0, 0, 0, 0, wd_p_wd_rem_wd_rem, wd_p_wd_rem_lda, 0, 0, 0, 0, wd_p_wd_rem_mhda, wd_p_wd_rem_death,
  sc_p_lda_rem, 0, 0, 0, 0, sc_p_lda_lda, 0, 0, 0, 0, sc_p_lda_mhda, sc_p_lda_death,
  0, 0, 0, 0, 0, 0, 1, 0, 0, 0, 0, 0,
  0, 0, 0, 0, 0, 0, 0, 1, 0, 0, 0, 0,
  0, 0, 0, 0, 0, 0, 0, 0, 1, 0, 0, 0,
  0, 0, 0, 0, 0, 0, 0, 0, 0, 1, 0, 0,
  sc_p_mhda_rem, 0, 0, 0, 0, sc_p_mhda_lda, 0, 0, 0, 0, sc_p_mhda_mhda, sc_p_mhda_death,
  0, 0, 0, 0, 0, 0, 0, 0, 0, 0, 0, 1,
  state_names =  c("REM", "S_REM", "TP_REM","S_TP_REM", "WD_REM", "LDA", "S_LDA", "TP_LDA", "S_TP_LDA", "WD_LDA","MHDA", "Death")
)


#Tapering with compliance

mat_tapering_compliance_3 <- define_transition(
  0, tp_p_rem_s_rem, 0, 0, 0, tp_p_rem_lda, 0, 0, 0, 0,tp_p_rem_mhda, tp_p_rem_death,
  0, 0, (tp_p_s_rem_tp_rem*11/12), 0, (tp_p_s_rem_tp_rem*1/12), tp_p_s_rem_lda, 0, 0, 0, 0, tp_p_s_rem_mhda, tp_p_s_rem_death,
  0, 0, (tp_p_tp_rem_tp_rem*11/12), 0, (tp_p_tp_rem_tp_rem*1/12), tp_p_tp_rem_lda, 0, 0, 0, 0, tp_p_tp_rem_mhda, tp_p_tp_rem_death,
  0, 0, 0, 1, 0, 0, 0, 0, 0, 0, 0, 0,
  0, 0, 0, 0, wd_p_wd_rem_wd_rem, wd_p_wd_rem_lda, 0, 0, 0, 0, wd_p_wd_rem_mhda, wd_p_wd_rem_death,
  0, tp_p_lda_rem, 0, 0, 0, 0, tp_p_lda_s_lda, 0, 0, 0, tp_p_lda_mhda, tp_p_lda_death,
  0, 0, tp_p_s_lda_s_rem, 0, 0, 0, 0, tp_p_s_lda_tp_lda, 0, 0, tp_p_s_lda_mhda, tp_p_s_lda_death,
  0, 0, tp_p_tp_lda_tp_rem, 0, 0, 0, 0, tp_p_tp_lda_tp_lda, 0, 0, tp_p_tp_lda_mhda, tp_p_tp_lda_death,
  0, 0, 0, 0, 0, 0, 0, 0, 1, 0, 0, 0,
  0, 0, 0, 0, 0, 0, 0, 0, 0, 1, 0, 0,
  sc_p_mhda_rem, 0, 0, 0, 0, sc_p_mhda_lda, 0, 0, 0, 0, sc_p_mhda_mhda, sc_p_mhda_death,
  0, 0, 0, 0, 0, 0, 0, 0, 0, 0, 0, 1,
  state_names =  c("REM", "S_REM", "TP_REM","S_TP_REM", "WD_REM", "LDA", "S_LDA", "TP_LDA", "S_TP_LDA", "WD_LDA","MHDA", "Death")
)

#Compliance for withdrawal and deescalation macht keinen Sinn, da hier eh nach kurzer Zeit Entzug stattfindet

strat_standard_compliance_3 <- define_strategy(
  transition = mat_standard_compliance_3,
  REM = state_REM,
  S_REM = state_s_REM,
  TP_REM = state_tp_REM,
  S_TP_REM = state_s_tp_REM,
  WD_REM = state_wd_REM,
  LDA = state_LDA,
  S_LDA = state_s_LDA,
  TP_LDA = state_tp_LDA,
  S_TP_LDA = state_s_tp_LDA,
  WD_LDA = state_wd_LDA,
  MHDA = state_MHDA,
  Death = state_death
)


strat_tapering_compliance_3 <- define_strategy(
  transition = mat_tapering_compliance_3,
  REM = state_REM,
  S_REM = state_s_REM,
  TP_REM = state_tp_REM,
  S_TP_REM = state_s_tp_REM,
  WD_REM = state_wd_REM,
  LDA = state_LDA,
  S_LDA = state_s_LDA,
  TP_LDA = state_tp_LDA,
  S_TP_LDA = state_s_tp_LDA,
  WD_LDA = state_wd_LDA,
  MHDA = state_MHDA,
  Death = state_death
)


#### Run Model

res_mod_compliance_tp_3 <- run_model(
  standard_compliance = strat_standard_compliance_3,
  tapering_compliance = strat_tapering_compliance_3,
  parameters = param,
  cycles = 120,
  cost = cost_total / 4,
  effect = utility / 4,
  init = c(0, 0, 0, 0, 0, 0, 0, 0, 0, 0, 1000, 0)
)

results_tp_compliance_3 <- summary(res_mod_compliance_tp_3)

res_mod_compliance_wd_3 <- run_model(
  standard_compliance = strat_standard_compliance_3,
  withdrawal = strat_withdrawal,
  parameters = param,
  cycles = 120,
  cost = cost_total / 4,
  effect = utility / 4,
  init = c(0, 0, 0, 0, 0, 0, 0, 0, 0, 0, 1000, 0)
)

results_wd_compliance_3 <- summary(res_mod_compliance_wd_3)


res_mod_compliance_de_3 <- run_model(
  standard_compliance = strat_standard_compliance_3,
  deescalation = strat_deescalation,
  parameters = param,
  cycles = 120,
  cost = cost_total / 4,
  effect = utility / 4,
  init = c(0, 0, 0, 0, 0, 0, 0, 0, 0, 0, 1000, 0)
)

results_de_compliance_3 <- summary(res_mod_compliance_de_3)

#non-compliance after 5 years

mat_standard_compliance_5 <- define_transition(
  (sc_p_rem_rem*19/20), 0, 0, 0, (sc_p_rem_rem*1/20),sc_p_rem_lda, 0, 0, 0, 0, sc_p_rem_mhda, sc_p_rem_death,
  0, 1, 0, 0, 0, 0, 0, 0, 0, 0, 0, 0,
  0, 0, 1, 0, 0, 0, 0, 0, 0, 0, 0, 0,
  0, 0, 0, 1, 0, 0, 0, 0, 0, 0, 0, 0,
  0, 0, 0, 0, wd_p_wd_rem_wd_rem, wd_p_wd_rem_lda, 0, 0, 0, 0, wd_p_wd_rem_mhda, wd_p_wd_rem_death,
  sc_p_lda_rem, 0, 0, 0, 0, sc_p_lda_lda, 0, 0, 0, 0, sc_p_lda_mhda, sc_p_lda_death,
  0, 0, 0, 0, 0, 0, 1, 0, 0, 0, 0, 0,
  0, 0, 0, 0, 0, 0, 0, 1, 0, 0, 0, 0,
  0, 0, 0, 0, 0, 0, 0, 0, 1, 0, 0, 0,
  0, 0, 0, 0, 0, 0, 0, 0, 0, 1, 0, 0,
  sc_p_mhda_rem, 0, 0, 0, 0, sc_p_mhda_lda, 0, 0, 0, 0, sc_p_mhda_mhda, sc_p_mhda_death,
  0, 0, 0, 0, 0, 0, 0, 0, 0, 0, 0, 1,
  state_names =  c("REM", "S_REM", "TP_REM","S_TP_REM", "WD_REM", "LDA", "S_LDA", "TP_LDA", "S_TP_LDA", "WD_LDA","MHDA", "Death")
)


#Tapering with compliance

mat_tapering_compliance_5 <- define_transition(
  0, tp_p_rem_s_rem, 0, 0, 0, tp_p_rem_lda, 0, 0, 0, 0,tp_p_rem_mhda, tp_p_rem_death,
  0, 0, (tp_p_s_rem_tp_rem*19/20), 0, (tp_p_s_rem_tp_rem*1/20), tp_p_s_rem_lda, 0, 0, 0, 0, tp_p_s_rem_mhda, tp_p_s_rem_death,
  0, 0, (tp_p_tp_rem_tp_rem*19/20), 0, (tp_p_tp_rem_tp_rem*1/20), tp_p_tp_rem_lda, 0, 0, 0, 0, tp_p_tp_rem_mhda, tp_p_tp_rem_death,
  0, 0, 0, 1, 0, 0, 0, 0, 0, 0, 0, 0,
  0, 0, 0, 0, wd_p_wd_rem_wd_rem, wd_p_wd_rem_lda, 0, 0, 0, 0, wd_p_wd_rem_mhda, wd_p_wd_rem_death,
  0, tp_p_lda_rem, 0, 0, 0, 0, tp_p_lda_s_lda, 0, 0, 0, tp_p_lda_mhda, tp_p_lda_death,
  0, 0, tp_p_s_lda_s_rem, 0, 0, 0, 0, tp_p_s_lda_tp_lda, 0, 0, tp_p_s_lda_mhda, tp_p_s_lda_death,
  0, 0, tp_p_tp_lda_tp_rem, 0, 0, 0, 0, tp_p_tp_lda_tp_lda, 0, 0, tp_p_tp_lda_mhda, tp_p_tp_lda_death,
  0, 0, 0, 0, 0, 0, 0, 0, 1, 0, 0, 0,
  0, 0, 0, 0, 0, 0, 0, 0, 0, 1, 0, 0,
  sc_p_mhda_rem, 0, 0, 0, 0, sc_p_mhda_lda, 0, 0, 0, 0, sc_p_mhda_mhda, sc_p_mhda_death,
  0, 0, 0, 0, 0, 0, 0, 0, 0, 0, 0, 1,
  state_names =  c("REM", "S_REM", "TP_REM","S_TP_REM", "WD_REM", "LDA", "S_LDA", "TP_LDA", "S_TP_LDA", "WD_LDA","MHDA", "Death")
)

#Compliance for withdrawal and deescalation macht keinen Sinn, da hier eh nach kurzer Zeit Entzug stattfindet,
# d.h. dass die compliance nur im Vergleich mit WD und DE in Standardform hier stattfindet

strat_standard_compliance_5 <- define_strategy(
  transition = mat_standard_compliance_5,
  REM = state_REM,
  S_REM = state_s_REM,
  TP_REM = state_tp_REM,
  S_TP_REM = state_s_tp_REM,
  WD_REM = state_wd_REM,
  LDA = state_LDA,
  S_LDA = state_s_LDA,
  TP_LDA = state_tp_LDA,
  S_TP_LDA = state_s_tp_LDA,
  WD_LDA = state_wd_LDA,
  MHDA = state_MHDA,
  Death = state_death
)


strat_tapering_compliance_5 <- define_strategy(
  transition = mat_tapering_compliance_5,
  REM = state_REM,
  S_REM = state_s_REM,
  TP_REM = state_tp_REM,
  S_TP_REM = state_s_tp_REM,
  WD_REM = state_wd_REM,
  LDA = state_LDA,
  S_LDA = state_s_LDA,
  TP_LDA = state_tp_LDA,
  S_TP_LDA = state_s_tp_LDA,
  WD_LDA = state_wd_LDA,
  MHDA = state_MHDA,
  Death = state_death
)


#### Run Model

res_mod_compliance_tp_5 <- run_model(
  standard_compliance = strat_standard_compliance_5,
  tapering_compliance = strat_tapering_compliance_5,
  parameters = param,
  cycles = 120,
  cost = cost_total / 4,
  effect = utility / 4,
  init = c(0, 0, 0, 0, 0, 0, 0, 0, 0, 0, 1000, 0)
)

results_tp_compliance_5 <- summary(res_mod_compliance_tp_5)

res_mod_compliance_wd_5 <- run_model(
  standard_compliance = strat_standard_compliance_5,
  withdrawal = strat_withdrawal,
  parameters = param,
  cycles = 120,
  cost = cost_total / 4,
  effect = utility / 4,
  init = c(0, 0, 0, 0, 0, 0, 0, 0, 0, 0, 1000, 0)
)

results_wd_compliance_5 <- summary(res_mod_compliance_wd_5)


res_mod_compliance_de_5 <- run_model(
  standard_compliance = strat_standard_compliance_5,
  deescalation = strat_deescalation,
  parameters = param,
  cycles = 120,
  cost = cost_total / 4,
  effect = utility / 4,
  init = c(0, 0, 0, 0, 0, 0, 0, 0, 0, 0, 1000, 0)
)

results_de_compliance_5 <- summary(res_mod_compliance_de_5)


#### Szenario-Analyse Einmalige Deeskalation ####

#Definition der zus?tzlichen States f?r einmalige Deeskalation

state_REM_1 <- define_state(
  cost_total = discount(cost_bDMARD + cost_DMARD + cost_other_drugs + cost_other_direct_REM, dr),
  utility = discount(u_REM , dr)
)

#State LDA

state_LDA_1 <- define_state(
  cost_total = discount(cost_bDMARD + cost_DMARD + cost_other_drugs + cost_other_direct_LDA, dr),
  utility = discount(u_LDA, dr)
)

#State MHDA

state_MHDA_1 <- define_state(
  cost_total = discount(cost_bDMARD + cost_DMARD + cost_other_drugs + cost_other_direct_MHDA, dr),
  utility = discount(u_MHDA, dr)
)


#Standard Care

mat_standard_1 <- define_transition(
  sc_p_rem_rem, 0, 0, 0, 0,sc_p_rem_lda, 0, 0, 0, 0, sc_p_rem_mhda, 0, 0, 0, sc_p_rem_death,
  0, 1, 0, 0, 0, 0, 0, 0, 0, 0, 0, 0, 0, 0, 0, 
  0, 0, 1, 0, 0, 0, 0, 0, 0, 0, 0, 0, 0, 0, 0,
  0, 0, 0, 1, 0, 0, 0, 0, 0, 0, 0, 0, 0, 0, 0,
  0, 0, 0, 0, 1, 0, 0, 0, 0, 0, 0, 0, 0, 0, 0,
  sc_p_lda_rem, 0, 0, 0, 0, sc_p_lda_lda, 0, 0, 0, 0, sc_p_lda_mhda, 0, 0, 0, sc_p_lda_death,
  0, 0, 0, 0, 0, 0, 1, 0, 0, 0, 0, 0, 0, 0, 0,
  0, 0, 0, 0, 0, 0, 0, 1, 0, 0, 0, 0, 0, 0, 0,
  0, 0, 0, 0, 0, 0, 0, 0, 1, 0, 0, 0, 0, 0, 0,
  0, 0, 0, 0, 0, 0, 0, 0, 0, 1, 0, 0, 0, 0, 0,
  sc_p_mhda_rem, 0, 0, 0, 0, sc_p_mhda_lda, 0, 0, 0, 0, sc_p_mhda_mhda, 0, 0, 0, sc_p_mhda_death,
  0, 0, 0, 0, 0, 0, 0, 0, 0, 0, 0, 1, 0, 0, 0,
  0, 0, 0, 0, 0, 0, 0, 0, 0, 0, 0, 0, 1, 0, 0,
  0, 0, 0, 0, 0, 0, 0, 0, 0, 0, 0, 0, 0, 1, 0,
  0, 0, 0, 0, 0, 0, 0, 0, 0, 0, 0, 0, 0, 0, 1,
  state_names =  c("REM", "S_REM", "TP_REM","S_TP_REM", "WD_REM", "LDA", "S_LDA", "TP_LDA", "S_TP_LDA", "WD_LDA","MHDA", "REM_1", "LDA_1", "MHDA_1", "Death")
)

#Tapering einmalig

#Tapering

mat_tapering_1 <- define_transition(
  0, tp_p_rem_s_rem, 0, 0, 0, tp_p_rem_lda, 0, 0, 0, 0,tp_p_rem_mhda, 0, 0, 0, tp_p_rem_death, #rem
  0, 0, tp_p_s_rem_tp_rem, 0, 0, tp_p_s_rem_lda, 0, 0, 0, 0, tp_p_s_rem_mhda, 0, 0, 0, tp_p_s_rem_death, #s_rem
  0, 0, tp_p_tp_rem_tp_rem, 0, 0, 0, 0, 0, 0, 0, 0, 0, tp_p_tp_rem_lda, tp_p_tp_rem_mhda, tp_p_tp_rem_death, #tp_rem
  0, 0, 0, 1, 0, 0, 0, 0, 0, 0, 0, 0, 0, 0, 0, # s_tp_rem
  0, 0, 0, 0, 1, 0, 0, 0, 0, 0, 0, 0, 0, 0, 0, # wd_rem
  0, tp_p_lda_rem, 0, 0, 0, 0, tp_p_lda_s_lda, 0, 0, 0, tp_p_lda_mhda, 0, 0, 0, tp_p_lda_death, #lda
  0, 0, tp_p_s_lda_s_rem, 0, 0, 0, 0, tp_p_s_lda_tp_lda, 0, 0, tp_p_s_lda_mhda, 0, 0, 0, tp_p_s_lda_death, #s_lda
  0, 0, tp_p_tp_lda_tp_rem, 0, 0, 0, 0, tp_p_tp_lda_tp_lda, 0, 0, 0, 0, 0, tp_p_tp_lda_mhda, tp_p_tp_lda_death, #tp_lda
  0, 0, 0, 0, 0, 0, 0, 0, 1, 0, 0, 0, 0, 0, 0, #s_tp_lda
  0, 0, 0, 0, 0, 0, 0, 0, 0, 1, 0, 0, 0, 0, 0, #wd_lda
  sc_p_mhda_rem, 0, 0, 0, 0, sc_p_mhda_lda, 0, 0, 0, 0, sc_p_mhda_mhda, 0, 0, 0, sc_p_mhda_death, #mhda
  0, 0, 0, 0, 0, 0, 0, 0, 0, 0, 0, sc_p_rem_rem, sc_p_rem_lda, sc_p_rem_mhda, sc_p_rem_death, #rem1
  0, 0, 0, 0, 0, 0, 0, 0, 0, 0, 0, sc_p_lda_rem, sc_p_lda_lda, sc_p_lda_mhda, sc_p_lda_death, #lda_1
  0, 0, 0, 0, 0, 0, 0, 0, 0, 0, 0, sc_p_mhda_rem, sc_p_mhda_lda, sc_p_mhda_mhda, sc_p_mhda_death, #mhda1
  0, 0, 0, 0, 0, 0, 0, 0, 0, 0, 0, 0, 0, 0, 1, # death
  state_names =  c("REM", "S_REM", "TP_REM","S_TP_REM", "WD_REM", "LDA", "S_LDA", "TP_LDA", "S_TP_LDA", "WD_LDA","MHDA", "REM_1", "LDA_1", "MHDA_1", "Death")
)


#Withdrawal einmalig


#Withdrawal

mat_withdrawal_1 <- define_transition(
  0, wd_p_rem_s_rem, 0, 0, 0, wd_p_rem_lda, 0, 0, 0, 0,wd_p_rem_mhda, 0, 0, 0, wd_p_rem_death, #rem
  0, 0, 0, 0, wd_p_s_rem_wd_rem, wd_p_s_rem_lda, 0, 0, 0, 0, wd_p_s_rem_mhda, 0, 0, 0, wd_p_s_rem_death, #s_rem
  0, 0, 1, 0, 0, 0, 0, 0, 0, 0, 0, 0, 0, 0, 0, #tp_rem 
  0, 0, 0, 1, 0, 0, 0, 0, 0, 0, 0, 0, 0, 0, 0, #s_tp
  0, 0, 0, 0, wd_p_wd_rem_wd_rem, 0, 0, 0, 0, 0, 0, 0, wd_p_wd_rem_lda, wd_p_wd_rem_mhda, wd_p_wd_rem_death, #wd_rem
  0, wd_p_lda_rem, 0, 0, 0, 0, wd_p_lda_s_lda, 0, 0, 0, wd_p_lda_mhda, 0, 0, 0, wd_p_lda_death, #lda
  0, 0, 0, 0, wd_p_s_lda_s_rem, 0, 0, 0, 0, wd_p_s_lda_wd_lda, wd_p_s_lda_mhda, 0, 0, 0, wd_p_s_lda_death, #s_lda
  0, 0, 0, 0, 0, 0, 0, 1, 0, 0, 0, 0, 0, 0, 0, #tp_lda
  0, 0, 0, 0, 0, 0, 0, 0, 1, 0, 0, 0, 0, 0, 0,  #s_tp_lda
  0, 0, 0, 0, wd_p_wd_lda_wd_rem, 0, 0, 0, 0, wd_p_wd_lda_wd_lda, 0, 0, 0, wd_p_wd_lda_mhda, wd_p_wd_lda_death, #wd_lda
  sc_p_mhda_rem, 0, 0, 0, 0, sc_p_mhda_lda, 0, 0, 0, 0, sc_p_mhda_mhda, 0, 0, 0, sc_p_mhda_death, #mhda
  0, 0, 0, 0, 0, 0, 0, 0, 0, 0, 0, sc_p_rem_rem, sc_p_rem_lda, sc_p_rem_mhda, sc_p_rem_death, 
  0, 0, 0, 0, 0, 0, 0, 0, 0, 0, 0, sc_p_lda_rem, sc_p_lda_lda, sc_p_lda_mhda, sc_p_lda_death,
  0, 0, 0, 0, 0, 0, 0, 0, 0, 0, 0, sc_p_mhda_rem, sc_p_mhda_lda, sc_p_mhda_mhda, sc_p_mhda_death,
  0, 0, 0, 0, 0, 0, 0, 0, 0, 0, 0, 0, 0, 0, 1,
  state_names =  c("REM", "S_REM", "TP_REM","S_TP_REM", "WD_REM", "LDA", "S_LDA", "TP_LDA", "S_TP_LDA", "WD_LDA","MHDA", "REM_1", "LDA_1", "MHDA_1", "Death")
)


#Sequential De-Escalation einmalig

#De-Escalation

mat_deescalation_1 <- define_transition(
  0, tp_p_rem_s_rem, 0, 0, 0, tp_p_rem_lda, 0, 0, 0, 0, tp_p_rem_mhda, 0, 0, 0, tp_p_rem_death,
  0, 0, tp_p_s_rem_tp_rem, 0, 0, tp_p_s_rem_lda, 0, 0, 0, 0, tp_p_s_rem_mhda, 0, 0, 0, tp_p_s_rem_death,
  0, 0, 0, tp_p_tp_rem_tp_rem, 0, 0, 0, 0, 0, 0, 0, 0, tp_p_tp_rem_lda, tp_p_tp_rem_mhda, tp_p_tp_rem_death,
  0, 0, 0, 0, tp_p_tp_rem_tp_rem, 0, 0, 0, 0, 0, 0, 0, tp_p_tp_rem_lda, tp_p_tp_rem_mhda, tp_p_tp_rem_death,
  0, 0, 0, 0, wd_p_wd_rem_wd_rem, 0, 0, 0, 0, 0, 0, 0, wd_p_wd_rem_lda, wd_p_wd_rem_mhda, wd_p_wd_rem_death,
  0, tp_p_lda_rem, 0, 0, 0, 0, tp_p_lda_s_lda, 0, 0, 0, tp_p_lda_mhda, 0, 0, 0, tp_p_lda_death,
  0, 0, tp_p_s_lda_s_rem, 0, 0, 0, 0, tp_p_s_lda_tp_lda, 0, 0, tp_p_s_lda_mhda, 0, 0, 0, tp_p_s_lda_death,
  0, 0, 0, tp_p_tp_lda_tp_rem, 0, 0, 0, 0, tp_p_tp_lda_tp_lda, 0, 0, 0, 0, tp_p_tp_lda_mhda, tp_p_tp_lda_death,
  0, 0, 0, 0, tp_p_tp_lda_tp_rem, 0, 0, 0, 0, tp_p_tp_lda_tp_lda, 0, 0, 0, tp_p_tp_lda_mhda, tp_p_tp_lda_death,
  0, 0, 0, 0, wd_p_wd_lda_wd_rem, 0, 0, 0, 0, wd_p_wd_lda_wd_lda, 0, 0, 0, wd_p_wd_lda_mhda, wd_p_wd_lda_death,
  sc_p_mhda_rem, 0, 0, 0, 0, sc_p_mhda_lda, 0, 0, 0, 0, sc_p_mhda_mhda, 0, 0, 0, sc_p_mhda_death,
  0, 0, 0, 0, 0, 0, 0, 0, 0, 0, 0, sc_p_rem_rem, sc_p_rem_lda, sc_p_rem_mhda, sc_p_rem_death, 
  0, 0, 0, 0, 0, 0, 0, 0, 0, 0, 0, sc_p_lda_rem, sc_p_lda_lda, sc_p_lda_mhda, sc_p_lda_death,
  0, 0, 0, 0, 0, 0, 0, 0, 0, 0, 0, sc_p_mhda_rem, sc_p_mhda_lda, sc_p_mhda_mhda, sc_p_mhda_death,
  0, 0, 0, 0, 0, 0, 0, 0, 0, 0, 0, 0, 0, 0, 1, 
  state_names =  c("REM", "S_REM", "TP_REM","S_TP_REM", "WD_REM", "LDA", "S_LDA", "TP_LDA", "S_TP_LDA", "WD_LDA","MHDA", "REM_1", "LDA_1", "MHDA_1", "Death")
)


strat_standard_1 <- define_strategy(
  transition = mat_standard_1,
  REM = state_REM,
  S_REM = state_s_REM,
  TP_REM = state_tp_REM,
  S_TP_REM = state_s_tp_REM,
  WD_REM = state_wd_REM,
  LDA = state_LDA,
  S_LDA = state_s_LDA,
  TP_LDA = state_tp_LDA,
  S_TP_LDA = state_s_tp_LDA,
  WD_LDA = state_wd_LDA,
  MHDA = state_MHDA,
  REM_1 = state_REM_1,
  LDA_1 = state_LDA_1,
  MHDA_1 = state_MHDA_1,
  Death = state_death
)


strat_tapering_1 <- define_strategy(
  transition = mat_tapering_1,
  REM = state_REM,
  S_REM = state_s_REM,
  TP_REM = state_tp_REM,
  S_TP_REM = state_s_tp_REM,
  WD_REM = state_wd_REM,
  LDA = state_LDA,
  S_LDA = state_s_LDA,
  TP_LDA = state_tp_LDA,
  S_TP_LDA = state_s_tp_LDA,
  WD_LDA = state_wd_LDA,
  MHDA = state_MHDA,
  REM_1 = state_REM_1,
  LDA_1 = state_LDA_1,
  MHDA_1 = state_MHDA_1,
  Death = state_death
)

strat_withdrawal_1 <- define_strategy(
  transition = mat_withdrawal_1,
  REM = state_REM,
  S_REM = state_s_REM,
  TP_REM = state_tp_REM,
  S_TP_REM = state_s_tp_REM,
  WD_REM = state_wd_REM,
  LDA = state_LDA,
  S_LDA = state_s_LDA,
  TP_LDA = state_tp_LDA,
  S_TP_LDA = state_s_tp_LDA,
  WD_LDA = state_wd_LDA,
  MHDA = state_MHDA,
  REM_1 = state_REM_1,
  LDA_1 = state_LDA_1,
  MHDA_1 = state_MHDA_1,
  Death = state_death
)

strat_deescalation_1 <- define_strategy(
  transition = mat_deescalation_1,
  REM = state_REM,
  S_REM = state_s_REM,
  TP_REM = state_tp_REM,
  S_TP_REM = state_s_tp_REM,
  WD_REM = state_wd_REM,
  LDA = state_LDA,
  S_LDA = state_s_LDA,
  TP_LDA = state_tp_LDA,
  S_TP_LDA = state_s_tp_LDA,
  WD_LDA = state_wd_LDA,
  MHDA = state_MHDA,
  REM_1 = state_REM_1,
  LDA_1 = state_LDA_1,
  MHDA_1 = state_MHDA_1,
  Death = state_death
)

res_mod_tapering_1 <- run_model(
  standard = strat_standard_1,
  tapering_1 = strat_tapering_1,
  parameters = param,
  cycles = 120,
  cost = cost_total / 4,
  effect = utility / 4,
  init = c(0, 0, 0, 0, 0, 0, 0, 0, 0, 0, 1000, 0, 0, 0, 0)
)

results_tp_one_time <- summary(res_mod_tapering_1)

res_mod_withdrawal_1 <- run_model(
  standard = strat_standard_1,
  withdrawal_1 = strat_withdrawal_1,
  parameters = param,
  cycles = 120,
  cost = cost_total / 4,
  effect = utility / 4,
  init = c(0, 0, 0, 0, 0, 0, 0, 0, 0, 0, 1000, 0, 0, 0, 0)
)

results_wd_one_time <- summary(res_mod_withdrawal_1)

res_mod_deescalation_1 <- run_model(
  standard = strat_standard_1,
  deescalation_1 = strat_deescalation_1,
  parameters = param,
  cycles = 120,
  cost = cost_total / 4,
  effect = utility / 4,
  init = c(0, 0, 0, 0, 0, 0, 0, 0, 0, 0, 1000, 0, 0, 0, 0)
)

results_de_one_time <- summary(res_mod_deescalation_1)


##### Szenario Analyse verschiedene Zeithorizonte ####

#Tapering

res_mod_tapering_5yrs <- run_model(
  standard = strat_standard,
  tapering = strat_tapering,
  parameters = param,
  cycles = 20,
  cost = cost_total / 4,
  effect = utility / 4,
  init = c(0, 0, 0, 0, 0, 0, 0, 0, 0, 0, 1000, 0)
)

results_tp_base_case_5yrs <- summary(res_mod_tapering_5yrs)

res_mod_tapering_10yrs <- run_model(
  standard = strat_standard,
  tapering = strat_tapering,
  parameters = param,
  cycles = 40,
  cost = cost_total / 4,
  effect = utility / 4,
  init = c(0, 0, 0, 0, 0, 0, 0, 0, 0, 0, 1000, 0)
)

results_tp_base_case_10yrs <- summary(res_mod_tapering_10yrs)

res_mod_tapering_20yrs <- run_model(
  standard = strat_standard,
  tapering = strat_tapering,
  parameters = param,
  cycles = 80,
  cost = cost_total / 4,
  effect = utility / 4,
  init = c(0, 0, 0, 0, 0, 0, 0, 0, 0, 0, 1000, 0)
)

results_tp_base_case_20yrs <- summary(res_mod_tapering_20yrs)

res_mod_tapering_40yrs <- run_model(
  standard = strat_standard,
  tapering = strat_tapering,
  parameters = param,
  cycles = 160,
  cost = cost_total / 4,
  effect = utility / 4,
  init = c(0, 0, 0, 0, 0, 0, 0, 0, 0, 0, 1000, 0)
)

results_tp_base_case_40yrs <- summary(res_mod_tapering_40yrs)


#Withdrawal

res_mod_withdrawal_5yrs <- run_model(
  standard = strat_standard,
  withdrawal = strat_withdrawal,
  parameters = param,
  cycles = 20,
  cost = cost_total / 4,
  effect = utility / 4,
  init = c(0, 0, 0, 0, 0, 0, 0, 0, 0, 0, 1000, 0)
)

results_wd_base_case_5yrs <- summary(res_mod_withdrawal_5yrs)

res_mod_withdrawal_10yrs <- run_model(
  standard = strat_standard,
  withdrawal = strat_withdrawal,
  parameters = param,
  cycles = 40,
  cost = cost_total / 4,
  effect = utility / 4,
  init = c(0, 0, 0, 0, 0, 0, 0, 0, 0, 0, 1000, 0)
)

results_wd_base_case_10yrs <- summary(res_mod_withdrawal_10yrs)

res_mod_withdrawal_20yrs <- run_model(
  standard = strat_standard,
  withdrawal = strat_withdrawal,
  parameters = param,
  cycles = 80,
  cost = cost_total / 4,
  effect = utility / 4,
  init = c(0, 0, 0, 0, 0, 0, 0, 0, 0, 0, 1000, 0)
)

results_wd_base_case_20yrs <- summary(res_mod_withdrawal_20yrs)

res_mod_withdrawal_40yrs <- run_model(
  standard = strat_standard,
  withdrawal = strat_withdrawal,
  parameters = param,
  cycles = 160,
  cost = cost_total / 4,
  effect = utility / 4,
  init = c(0, 0, 0, 0, 0, 0, 0, 0, 0, 0, 1000, 0)
)

results_wd_base_case_40yrs <- summary(res_mod_withdrawal_40yrs)

#deescalation

res_mod_deescalation_5yrs <- run_model(
  standard = strat_standard,
  deescalation = strat_deescalation,
  parameters = param,
  cycles = 20,
  cost = cost_total / 4,
  effect = utility / 4,
  init = c(0, 0, 0, 0, 0, 0, 0, 0, 0, 0, 1000, 0)
)

results_de_base_case_5yrs <- summary(res_mod_deescalation_5yrs)

res_mod_deescalation_10yrs <- run_model(
  standard = strat_standard,
  deescalation = strat_deescalation,
  parameters = param,
  cycles = 40,
  cost = cost_total / 4,
  effect = utility / 4,
  init = c(0, 0, 0, 0, 0, 0, 0, 0, 0, 0, 1000, 0)
)

results_de_base_case_10yrs <- summary(res_mod_deescalation_10yrs)

res_mod_deescalation_20yrs <- run_model(
  standard = strat_standard,
  deescalation = strat_deescalation,
  parameters = param,
  cycles = 80,
  cost = cost_total / 4,
  effect = utility / 4,
  init = c(0, 0, 0, 0, 0, 0, 0, 0, 0, 0, 1000, 0)
)

results_de_base_case_20yrs <- summary(res_mod_deescalation_20yrs)

res_mod_deescalation_40yrs <- run_model(
  standard = strat_standard,
  deescalation = strat_deescalation,
  parameters = param,
  cycles = 160,
  cost = cost_total / 4,
  effect = utility / 4,
  init = c(0, 0, 0, 0, 0, 0, 0, 0, 0, 0, 1000, 0)
)

results_de_base_case_40yrs <- summary(res_mod_deescalation_40yrs)


results_all <- as.data.frame(t(matrix(c(results_tp_base_case$res_comp$.cost[2], results_tp_base_case$res_comp$.effect[2], results_tp_base_case$res_comp$.icer[2],
                               results_wd_base_case$res_comp$.cost[2], results_wd_base_case$res_comp$.effect[2], results_wd_base_case$res_comp$.icer[2],
                               results_de_base_case$res_comp$.cost[2], results_de_base_case$res_comp$.effect[2], results_de_base_case$res_comp$.icer[2],
                               results_tp_base_case_decrement$res_comp$.cost[2], results_tp_base_case_decrement$res_comp$.effect[2], results_tp_base_case_decrement$res_comp$.icer[2],
                               results_wd_base_case_decrement$res_comp$.cost[2], results_wd_base_case_decrement$res_comp$.effect[2], results_wd_base_case_decrement$res_comp$.icer[2],
                               results_de_base_case_decrement$res_comp$.cost[2], results_de_base_case_decrement$res_comp$.effect[2], results_de_base_case_decrement$res_comp$.icer[2],
                               results_tp_compliance_2$res_comp$.cost[2], results_tp_compliance_2$res_comp$.effect[2], results_tp_compliance_2$res_comp$.icer[2],
                               results_wd_compliance_2$res_comp$.cost[2], results_wd_compliance_2$res_comp$.effect[2], results_wd_compliance_2$res_comp$.icer[2],
                               results_de_compliance_2$res_comp$.cost[2], results_de_compliance_2$res_comp$.effect[2], results_de_compliance_2$res_comp$.icer[2],
                               results_tp_compliance_3$res_comp$.cost[2], results_tp_compliance_3$res_comp$.effect[2], results_tp_compliance_3$res_comp$.icer[2],
                               results_wd_compliance_3$res_comp$.cost[2], results_wd_compliance_3$res_comp$.effect[2], results_wd_compliance_3$res_comp$.icer[2],
                               results_de_compliance_3$res_comp$.cost[2], results_de_compliance_3$res_comp$.effect[2], results_de_compliance_3$res_comp$.icer[2],
                               results_tp_compliance_5$res_comp$.cost[2], results_tp_compliance_5$res_comp$.effect[2], results_tp_compliance_5$res_comp$.icer[2],
                               results_wd_compliance_5$res_comp$.cost[2], results_wd_compliance_5$res_comp$.effect[2], results_wd_compliance_5$res_comp$.icer[2],
                               results_de_compliance_5$res_comp$.cost[2], results_de_compliance_5$res_comp$.effect[2], results_de_compliance_5$res_comp$.icer[2],
                               results_tp_one_time$res_comp$.cost[2], results_tp_one_time$res_comp$.effect[2], results_tp_one_time$res_comp$.icer[2],
                               results_wd_one_time$res_comp$.cost[2], results_wd_one_time$res_comp$.effect[2], results_wd_one_time$res_comp$.icer[2],
                               results_de_one_time$res_comp$.cost[2], results_de_one_time$res_comp$.effect[2], results_de_one_time$res_comp$.icer[2],
                               results_tp_base_case_5yrs$res_comp$.cost[2], results_tp_base_case_5yrs$res_comp$.effect[2], results_tp_base_case_5yrs$res_comp$.icer[2],
                               results_tp_base_case_10yrs$res_comp$.cost[2], results_tp_base_case_10yrs$res_comp$.effect[2], results_tp_base_case_10yrs$res_comp$.icer[2],
                               results_tp_base_case_20yrs$res_comp$.cost[2], results_tp_base_case_20yrs$res_comp$.effect[2], results_tp_base_case_20yrs$res_comp$.icer[2],
                               results_tp_base_case_40yrs$res_comp$.cost[2], results_tp_base_case_40yrs$res_comp$.effect[2], results_tp_base_case_40yrs$res_comp$.icer[2],
                               results_wd_base_case_5yrs$res_comp$.cost[2], results_wd_base_case_5yrs$res_comp$.effect[2], results_wd_base_case_5yrs$res_comp$.icer[2],
                               results_wd_base_case_10yrs$res_comp$.cost[2], results_wd_base_case_10yrs$res_comp$.effect[2], results_wd_base_case_10yrs$res_comp$.icer[2],
                               results_wd_base_case_20yrs$res_comp$.cost[2], results_wd_base_case_20yrs$res_comp$.effect[2], results_wd_base_case_20yrs$res_comp$.icer[2],
                               results_wd_base_case_40yrs$res_comp$.cost[2], results_wd_base_case_40yrs$res_comp$.effect[2], results_wd_base_case_40yrs$res_comp$.icer[2],
                               results_de_base_case_5yrs$res_comp$.cost[2], results_de_base_case_5yrs$res_comp$.effect[2], results_de_base_case_5yrs$res_comp$.icer[2],
                               results_de_base_case_10yrs$res_comp$.cost[2], results_de_base_case_10yrs$res_comp$.effect[2], results_de_base_case_10yrs$res_comp$.icer[2],
                               results_de_base_case_20yrs$res_comp$.cost[2], results_de_base_case_20yrs$res_comp$.effect[2], results_de_base_case_20yrs$res_comp$.icer[2],
                               results_de_base_case_40yrs$res_comp$.cost[2], results_de_base_case_40yrs$res_comp$.effect[2], results_de_base_case_40yrs$res_comp$.icer[2]
                               ),
                             nrow = 30,
                             ncol = 3,
                             byrow = TRUE)))

colnames(results_all) <- c("TP_BC", "WD_BC", "DE_BC", 
                  "TP_DECR", "WD_DECR", "DE_DECR", 
                  "TP_COMP_2", "WD_COMP_2", "DE_COMP_2", 
                  "TP_COMP_3", "WD_COMP_3", "DE_COMP_3",
                  "TP_COMP_5", "WD_COMP_5", "DE_COMP_5",
                  "TP_OT", "WD_OT", "DE_OT",
                  "TP_BC_5", "TP_BC_10", "TP_BC_20", "TP_BC_40",
                  "WD_BC_5", "WD_BC_10", "WD_BC_20", "WD_BC_40",
                  "DE_BC_5", "DE_BC_10", "DE_BC_20", "DE_BC_40"
                  )

rownames(results_all) <- c("incr. cost", "incr. effect", "ICER")


write.xlsx(as.data.frame(results_all), file = "190909_results_all_3_months_REVIEW_PLOS_ONE.xlsx")


##### Deterministische Sensitivit?tsanalyse ####

dsa_bounds <- define_dsa(
  
  sc_p_rem_1, 0.845675615447657, 0.958542596211402,
  sc_p_rem_2, 0.00387040897923199, 0.099998374652381,
  sc_p_rem_3, 0, 0.104760663478463,
  
  sc_p_lda_1, 0.17029122032667, 0.487881224759106,
  sc_p_lda_2, 0.507888958578847, 0.770037720772682,
  sc_p_lda_3, 0.00797733235358248, 0.0431232406201806,
  
  sc_p_mhda_1, 0.128954586274597, 0.221861548975783,
  sc_p_mhda_2, 0.0593385008664096, 0.119639247755461,
  sc_p_mhda_3, 0.660900242445076, 0.8014987526936,
  
  #Tapering
  
  tp_p_rem_1, 0.756226234708953, 0.990298245611824,
  tp_p_rem_2, 0.00845156856669055, 0.213770653655532,
  tp_p_rem_3, 0.0124757664845221, 0.145762499024304,
  
  tp_p_lda_1, 0.194604528273958, 0.314768677570602,
  tp_p_lda_2, 0.659820362488432, 0.783435564334026,
  tp_p_lda_3, 0.00271497346990513, 0.0446558938630773,
  
  #Withdrawal
  
  wd_p_rem_1, 0.641093740317668, 0.837780250267791,
  wd_p_rem_2, 0.0319602165565785, 0.136651067629126,
  wd_p_rem_3, 0.101222859192528, 0.222036780173778,
  
  wd_p_lda_1, 0.0871151002520199, 0.265614189665557,
  wd_p_lda_2, 0.689683776809731, 0.774629212106376,
  wd_p_lda_3, 0.00860851022990054, 0.172486926788124,
  
  u_REM, .69, .81,
  u_LDA, .68, .74,
  u_MHDA, .57, .64,
  
  #Annual costs
  
  cost_bDMARD, 8147, 21520,
  cost_DMARD, 596, 1575,
  cost_other_drugs, 25, 65,
  cost_other_direct_REM, ifelse(cohort_age >= 65, 1112, 821), ifelse(cohort_age >= 65, 2936, 2168),
  cost_other_direct_LDA, ifelse(cohort_age >= 65, 1330, 1272), ifelse(cohort_age >= 65, 3512, 3360),
  cost_other_direct_MHDA, ifelse(cohort_age >= 65, 2132, 2039), ifelse(cohort_age >= 65, 5630, 5387),
  
  dr, 0, 0.015
)

#DSA

res_dsa_tp <- run_dsa(
  model = res_mod_tapering,
  dsa = dsa_bounds
)

res_dsa_wd <- run_dsa(
  model = res_mod_withdrawal,
  dsa = dsa_bounds
)

res_dsa_de <- run_dsa(
  model = res_mod_deescalation,
  dsa = dsa_bounds
)

#Export der Ergebnisse der DSA

setwd("Z:/bwl/Arbeitsbereiche/FB_Sozoek_BWL_HealthCareManagement/Mitarbeiter/03 Projekte laufend/RA Deeskalation/2_Models/3-months/DSA")

write.xlsx(as_tibble(res_dsa_tp$dsa), file = "dsa_output_tapering.xlsx")

write.xlsx(as_tibble(res_dsa_wd$dsa), file = "dsa_output_withdrawal.xlsx")

write.xlsx(as_tibble(res_dsa_de$dsa), file = "dsa_output_deescalation.xlsx")


#### Probabilistische Sensitivit?tsanalyse ####

psa_distributions <- define_psa(
  
  #Gewichtung der Anzahl der Patienten aus den RCTs mit der gepoolten WS, um keine Pseudo-Genauigkeit durch Annahme von Patienten-
  #zahlen zu vermeiden
  
  #REM N = 124 
  sc_p_rem_1 + sc_p_rem_2 + sc_p_rem_3 ~ multinomial(111, 8, 6), 
  
  #LDA N = 383
  sc_p_lda_1 + sc_p_lda_2 + sc_p_lda_3 ~ multinomial(126, 245, 10),
  
  #MHDA N = 4788
  sc_p_mhda_1 + sc_p_mhda_2 + sc_p_mhda_3 ~ multinomial(843, 429, 3499),
  
  #TP_REM N = 63
  tp_p_rem_1 + tp_p_rem_2 + tp_p_rem_3 ~ multinomial(55, 7, 5),
  
  #TP_LDA N = 175
  tp_p_lda_1 + tp_p_lda_2 + tp_p_lda_3 ~ multinomial(45, 126, 5),
  
  #wd_REM N = 184
  wd_p_rem_1 + wd_p_rem_2 + wd_p_rem_3 ~ multinomial(136, 16, 30),
  
  #wd_LDA N = 332
  wd_p_lda_1 + wd_p_lda_2 + wd_p_lda_3 ~ multinomial(59, 243, 30),
  
  
  cost_bDMARD ~ gamma(mean = 14834, sd = 6687),
  cost_DMARD ~ gamma(mean = 1086, sd = 490),
  cost_other_drugs ~ gamma(mean = 45, sd = 20),
  cost_other_direct_REM ~ gamma(mean = 1760, sd = 793),
  cost_other_direct_LDA ~ gamma(mean = 2368, sd = 1068),
  cost_other_direct_MHDA ~ gamma(mean = 3797, sd = 1712),
  
  
  u_REM ~ beta(shape1 = 0.713319458896982, shape2 = 0.237773152965661),
  u_LDA ~ beta(shape1 = 0.811217481789802, shape2 = 0.331342351716962),
  u_MHDA ~ beta(shape1 = 0.89843912591051, shape2 = 0.598959417273673)
)

#PSA

library(parallel)

use_cluster(3)

res_psa_tp <- run_psa(
  model = res_mod_tapering,
  psa = psa_distributions,
  N = 10000
)

res_psa_wd <- run_psa(
  model = res_mod_withdrawal,
  psa = psa_distributions,
  N = 10000
)


res_psa_de <- run_psa(
  model = res_mod_deescalation,
  psa = psa_distributions,
  N = 10000
)

close_cluster()

#Export der Ergebnisse der PSA

setwd("Z:/bwl/Arbeitsbereiche/FB_Sozoek_BWL_HealthCareManagement/Mitarbeiter/03 Projekte laufend/RA Deeskalation/2_Models/3-months")

write.csv(as_tibble(res_psa_tp$psa), file = "psa_output_tapering_PLOS_one.csv")

write.csv(as_tibble(res_psa_wd$psa), file = "psa_output_withdrawal_PLOS_one.csv")

write.csv(as_tibble(res_psa_de$psa), file = "psa_output_deescalation_PLOS_one.csv")
