# Supplementary material for: Cost-utility analysis of de-escalating biological disease-modifying anti-rheumatic drugs in patients with rheumatoid arthritis
Source: PLoS One. 2020 Jan 2;15(1):e0226754. doi: 10.1371/journal.pone.0226754 (PMC6939943; doi:10.1371/journal.pone.0226754)
Supplement: S4 R Code — (R) [file pone.0226754.s006.R]

library(metafor)
library(dplyr)
library(heemod)
library(xlsx)

#Arbeitsverzeichnis auf Netzlaufwerk setzen

setwd("Z:/bwl/Arbeitsbereiche/FB_Sozoek_BWL_HealthCareManagement/Mitarbeiter/03 Projekte laufend/RA Deeskalation/1_Pooling/190902 3 month probs")

#Datensatz importieren

cycle_length = 3

study_pool = read.csv2("190909 Study Review v5.csv", header = TRUE, sep = ",", stringsAsFactors = FALSE)

study_pool = filter(study_pool, exclude == "0")
study_pool = select(study_pool, 
                         id, 
                         early.RA, 
                         type_de.escalation, 
                         tapering, 
                         withdrawal, 
                         Inclusion_State,
                         duration, 
                         N, 
                         dropouts, 
                         REM, 
                         LDA, 
                         MHDA)

study_pool = mutate(study_pool,
                    N_corr = ifelse(is.na(dropouts), N, N - dropouts),
                    freq_REM = ifelse(is.na(REM), NA, REM / N_corr),
                    freq_LDA = ifelse(is.na(LDA), NA, LDA / N_corr),
                    freq_MHDA = ifelse(is.na(MHDA), NA, MHDA / N_corr)
                    )

#Filter f?r Standard Care

sc_pool = filter(study_pool, tapering == "0" & withdrawal == "0" & !is.na(freq_MHDA) & !is.na(freq_REM) & !is.na(freq_LDA))

#Filter nach States

sc_pool_REM = filter(sc_pool, Inclusion_State == "REM")
sc_pool_REM = mutate(sc_pool_REM,
                     p_REM_LDA = rescale_prob(freq_LDA, to = cycle_length/12, from = duration/12),
                     var_REM_LDA = (p_REM_LDA * (1 - p_REM_LDA)) / N,
                     p_REM_MHDA = 1 - (1 - freq_MHDA) ^ (cycle_length/duration),
                     var_REM_MHDA = (p_REM_MHDA * (1 - p_REM_MHDA)) / N,
                     p_REM_REM = 1 - p_REM_LDA - p_REM_MHDA,
                     var_REM_REM = (p_REM_REM * (1 - p_REM_REM)) / N
                     )


sc_pool_REM_REM = filter(sc_pool_REM,
                         p_REM_REM != "0"
)

sc_pool_REM_LDA = filter(sc_pool_REM,
                         p_REM_LDA != "0"
)

sc_pool_REM_MHDA = filter(sc_pool_REM,
                         p_REM_MHDA != "0"
)

#RE Pooling REM

res_REM_REM <- rma(yi = p_REM_REM, vi = var_REM_REM, data = sc_pool_REM_REM, method = "DL")
res_REM_LDA <- rma(yi = p_REM_LDA, vi = var_REM_LDA, data = sc_pool_REM_LDA, method = "DL")
res_REM_MHDA <- rma(yi = p_REM_MHDA, vi = var_REM_MHDA, data = sc_pool_REM_MHDA, method = "DL")

#Filter nach States

sc_pool_LDA = filter(sc_pool, Inclusion_State == "LDA" | Inclusion_State == "REM or LDA")
sc_pool_LDA = mutate(sc_pool_LDA,
                     p_LDA_REM = rescale_prob(freq_REM, to = cycle_length/12, from = duration/12),
                     var_LDA_REM = (p_LDA_REM * (1 - p_LDA_REM)) / N,
                     p_LDA_MHDA = 1 - (1 - freq_MHDA) ^ (cycle_length/duration),
                     var_LDA_MHDA = (p_LDA_MHDA * (1 - p_LDA_MHDA)) / N,
                     p_LDA_LDA = 1 - p_LDA_REM - p_LDA_MHDA,
                     var_LDA_LDA = (p_LDA_LDA * (1 - p_LDA_LDA)) / N
)

sc_pool_LDA_REM = filter(sc_pool_LDA,
                         p_LDA_REM != "0"
)

sc_pool_LDA_LDA = filter(sc_pool_LDA,
                         p_LDA_LDA != "0"
)

sc_pool_LDA_MHDA = filter(sc_pool_LDA,
                          p_LDA_MHDA != "0"
)

#RE Pooling LDA

res_LDA_REM <- rma(yi = p_LDA_REM, vi = var_LDA_REM, data = sc_pool_LDA_REM, method = "DL")
res_LDA_LDA <- rma(yi = p_LDA_LDA, vi = var_LDA_LDA, data = sc_pool_LDA_LDA, method = "DL")
res_LDA_MHDA <- rma(yi = p_LDA_MHDA, vi = var_LDA_MHDA, data = sc_pool_LDA_MHDA, method = "DL")


#Filter nach States

sc_pool_MHDA = filter(sc_pool, Inclusion_State == "MDA" | Inclusion_State == "HDA" | Inclusion_State == "MDA or HDA")
sc_pool_MHDA = mutate(sc_pool_MHDA,
                     p_MHDA_REM = rescale_prob(freq_REM, to = cycle_length/12, from = duration/12),
                     var_MHDA_REM = (p_MHDA_REM * (1 - p_MHDA_REM)) / N,
                     p_MHDA_LDA = rescale_prob(freq_LDA, to = cycle_length/12, from = duration/12),
                     var_MHDA_LDA = (p_MHDA_LDA * (1 - p_MHDA_LDA)) / N,
                     p_MHDA_MHDA = 1 - p_MHDA_REM - p_MHDA_LDA,
                     var_MHDA_MHDA = (p_MHDA_MHDA * (1 - p_MHDA_MHDA)) / N
)


sc_pool_MHDA_REM = filter(sc_pool_MHDA,
                          p_MHDA_REM != "0"
)

sc_pool_MHDA_LDA = filter(sc_pool_MHDA,
                          p_MHDA_LDA != "0"
)

sc_pool_MHDA_MHDA = filter(sc_pool_MHDA,
                           p_MHDA_MHDA != "0"
)

res_MHDA_REM <- rma(yi = p_MHDA_REM, vi = var_MHDA_REM, data = sc_pool_MHDA, method = "DL")
res_MHDA_LDA <- rma(yi = p_MHDA_LDA, vi = var_MHDA_LDA, data = sc_pool_MHDA, method = "DL")
res_MHDA_MHDA <- rma(yi = p_MHDA_MHDA, vi = var_MHDA_MHDA, data = sc_pool_MHDA, method = "DL")


#Erstellen von Vektoren f?r jede WS mit gesch?tztem Effekt, Standard-Error, P-Wert sowie Grenzen des Konfidenzintervalls

REM_REM <- c(res_REM_REM$b, res_REM_REM$se, res_REM_REM$pval, res_REM_REM$ci.lb, res_REM_REM$ci.ub, res_REM_REM$k, mean(sc_pool_REM$p_REM_REM))
REM_LDA <- c(res_REM_LDA$b, res_REM_LDA$se, res_REM_LDA$pval, res_REM_LDA$ci.lb, res_REM_LDA$ci.ub, res_REM_LDA$k, mean(sc_pool_REM$p_REM_LDA))
REM_MHDA <- c(res_REM_MHDA$b, res_REM_MHDA$se, res_REM_MHDA$pval, res_REM_MHDA$ci.lb, res_REM_MHDA$ci.ub, res_REM_LDA$k, mean(sc_pool_REM$p_REM_MHDA))

LDA_REM <- c(res_LDA_REM$b, res_LDA_REM$se, res_LDA_REM$pval, res_LDA_REM$ci.lb, res_LDA_REM$ci.ub, res_LDA_REM$k, mean(sc_pool_LDA$p_LDA_REM))
LDA_LDA <- c(res_LDA_LDA$b, res_LDA_LDA$se, res_LDA_LDA$pval, res_LDA_LDA$ci.lb, res_LDA_LDA$ci.ub, res_LDA_LDA$k, mean(sc_pool_LDA$p_LDA_LDA))
LDA_MHDA <- c(res_LDA_MHDA$b, res_LDA_MHDA$se, res_LDA_MHDA$pval, res_LDA_MHDA$ci.lb, res_LDA_MHDA$ci.ub, res_LDA_MHDA$k, mean(sc_pool_LDA$p_LDA_MHDA))

MHDA_REM <- c(res_MHDA_REM$b, res_MHDA_REM$se, res_MHDA_REM$pval, res_MHDA_REM$ci.lb, res_MHDA_REM$ci.ub, res_MHDA_REM$k, mean(sc_pool_MHDA$p_MHDA_REM))
MHDA_LDA <- c(res_MHDA_LDA$b, res_MHDA_LDA$se, res_MHDA_LDA$pval, res_MHDA_LDA$ci.lb, res_MHDA_LDA$ci.ub, res_MHDA_LDA$k, mean(sc_pool_MHDA$p_MHDA_LDA))
MHDA_MHDA <- c(res_MHDA_MHDA$b, res_MHDA_MHDA$se, res_MHDA_MHDA$pval, res_MHDA_MHDA$ci.lb, res_MHDA_MHDA$ci.ub, res_MHDA_MHDA$k, mean(sc_pool_MHDA$p_MHDA_MHDA))	


#Zusammenf?hren der Variablen in einen Datensatz und Export zu Excel

overview <- rbind(
  REM_REM, REM_LDA, REM_MHDA, 
  LDA_REM, LDA_LDA, LDA_MHDA,
  MHDA_REM, MHDA_LDA, MHDA_MHDA)

colnames(overview) <- c("effect size", "SE", "p-value", "CI LB", "CI UB", "k", "Mean")

overview <- data.frame(overview)

write.xlsx(overview, file = "overview_standard_care.xlsx")

write.xlsx(sc_pool_REM, file = "sc_rem_inputs.xlsx")
write.xlsx(sc_pool_LDA, file = "sc_lda_inputs.xlsx")
write.xlsx(sc_pool_MHDA, file = "sc_mhda_inputs.xlsx")
